1                   **Tracking SARS-CoV-2 in rivers as a tool for epidemiological surveillance**

2

3   María Noel Maidana-Kulesza<sup>1,#</sup>, Hugo Ramiro Poma<sup>1,#</sup>, Diego Gastón Sanguino-Jorquera<sup>1</sup>,  
4   Sarita Isabel Reyes<sup>1</sup>, María del Milagro Said-Adamo<sup>1,2</sup>, Martín Mainardi Remis<sup>1,3</sup>, Dolores  
5   Gutiérrez-Cacciabue<sup>1,3</sup>, Héctor Antonio Cristóbal<sup>1,2</sup>, Mercedes Cecilia Cruz<sup>1</sup>, Mónica  
6                   Aparicio González<sup>1</sup>, Verónica Beatriz Rajal<sup>1,3,4,\*</sup>

7

8   <sup>1</sup> Laboratorio de Aguas y Suelos, Instituto de Investigaciones para la Industria Química  
9   (INIQUI), Universidad Nacional de Salta (UNSa) – Consejo Nacional de Investigaciones  
10   Científicas y Técnicas (CONICET), Av. Bolivia 5150, Salta, 4400, Argentina

11   <sup>2</sup> Facultad de Ciencias Naturales, UNSa, Av. Bolivia 5150, Salta, 4400, Argentina

12   <sup>3</sup> Facultad de Ingeniería, UNSa, Av. Bolivia 5150, Salta, 4400, Argentina

13   <sup>4</sup> Singapore Centre for Environmental Life Science Engineering (SCELSE), Nanyang  
14   Technological University, Singapore.

15

16   # Shared first authorship

17   \* Corresponding author: [vbrajal@gmail.com](mailto:vbrajal@gmail.com); UNSa, Av. Bolivia 5150, Salta, 4400,  
18   Argentina

19

20

## 21 **Abstract**

22 The aim of this work was to evaluate if rivers could be used for SARS-CoV-2 surveillance  
23 to support health authorities. Five sampling points from three rivers (AR-1 and AR-2 in  
24 Arenales River, MR-1 and MR-2 in Mojotoro River, and CR in La Caldera River) from the  
25 Province of Salta (Argentina), two of them receiving the discharges of the wastewater  
26 plants (WWTP) of the city of Salta, were monitored from July to December 2020 during the  
27 first wave of COVID-19. Fifteen water samples from each point (75 samples in total) were  
28 collected and characterized physico-chemically and microbiologically and SARS-CoV-2  
29 was quantitatively detected by RT-qPCR. In addition, two targets linked to human  
30 contributions, human polyomavirus (HPyV) and RNase P, were quantified and used to  
31 normalize the SARS-CoV-2 concentration, which was ultimately compared to the active  
32 reported COVID-19 cases. Statistical analyses allowed us to verify the correlation between  
33 SARS-CoV-2 and the concentration of fecal indicator bacteria (FIB), as well as to find  
34 similarities and differences between sampling points. La Caldera River showed the best  
35 water quality, and FIB were within acceptable limits for recreational activities. Although  
36 Mojotoro River receives the discharge of the northern WWTP of the city, it did not affect  
37 the water quality. Instead, the Arenales River presented the poorest water quality and the  
38 river at AR-2 was negatively affected by the discharges of the southern WWTP, which  
39 contributed to the significant increase of fecal contamination. SARS-CoV-2 was only found  
40 in about half of the samples and in low concentrations in La Caldera and Mojotoro Rivers,  
41 while it was high and persistent in the Arenales River. None of the two human tracers was  
42 detected in CR, only HPyV was found in MR-1, MR-2 and AR-1, and both were quantified  
43 in AR-2. The experimental and the normalized (using the two tracers) viral concentrations  
44 strongly correlated with the curve of active reported COVID-19 cases; thus, the Arenales  
45 River at AR-2 reflected the epidemiological situation of the city. This is, to the best of our

46 knowledge, the first study that showed the dynamic of SARS-CoV-2 concentration in an  
47 urban river highly impacted by wastewater and proved that can be used for SARS-CoV-2  
48 surveillance to support health authorities.

49

50 **Keywords:** SARS-CoV-2; water quality; human tracers; normalization; rivers impacted by  
51 wastewater; epidemiological surveillance

52

## 53 1. Introduction

54 The *Coronaviridae* family includes a broad spectrum of viruses that cause infections in  
55 various vertebrate animals including humans. Human Coronavirus are generally  
56 responsible for common colds. However, severe acute respiratory syndrome coronavirus 1  
57 (SARS-CoV1) and Middle East respiratory syndrome coronavirus (MERS-CoV) were  
58 responsible for global epidemics, with high rates of morbidity and mortality, in 2003 and  
59 2012, respectively (Peiris et al, 2003; Zaki et al, 2012). On 31 December 2019, the World  
60 Health Organization was informed about pneumonia cases of unknown origin in Wuhan,  
61 China. On 7 January 2020 the new virus, called 2019-nCoV at that moment, was identified  
62 as the cause and on 11 February 2020, it was named as the severe acute respiratory  
63 syndrome coronavirus 2 (SARS-CoV-2) by the International Committee on Virus  
64 Taxonomy (Gorbalenya et al., 2020). The virus spread rapidly among the population in the  
65 globe and the pandemic was declared in mid-March 2020. Since then, it has infected more  
66 than 176 million people and 3.8 million confirmed deaths by June 16<sup>th</sup>, 2021 (WHO, 2020).

67 SARS-CoV-2 is an enveloped single-stranded positive-sense RNA virus with an  
68 approximate diameter of 80 to 120 nm. The main transmission pathway is person-to-  
69 person, mainly airborne by aerosols, droplets, and sputum, formed during breathing,  
70 sneezing, coughing, or talking (Zhang et al., 2020a). Another way of transmission  
71 described initially was by contact with contaminated fomites; however, this hypothesis lost  
72 strength and is yet under discussion (Harrison et al., 2020; Kampf et al., 2020; Mukhra et  
73 al., 2020).

74 Although the 2019-nCoV infection (COVID-19) is mainly a respiratory disease, SARS-CoV-  
75 2 also replicates in the enterocytes from ileum and colon (Zhang et al., 2020b). Thus, a  
76 fraction of infected people, symptomatic or asymptomatic, excrete the virus in feces (Xiao  
77 et al., 2020b; Zhang et al., 2020c; Zhang et al., 2020d) and urine (Guan et al., 2020; Jeong

78 et al., 2020) in variable concentrations. Furthermore, in one study the virus was isolated  
79 from urine (Sun et al., 2020) and in another from stool samples and propagated in Vero E6  
80 cells (Xiao et al., 2020a). The fact that viral particles remain infective after being excreted  
81 through fecal matter, supports the hypothesis of a possible fecal-oral (Amirian, 2020; Jiang  
82 et al., 2020; Park et al., 2020; Wölfel et al., 2020) or a fecal-respiratory (Xiao et al., 2020a)  
83 route of transmission, although they have not been fully established yet.

84 The viral circulation in the population of a city, or a region, is reflected in the viral loads in  
85 their wastewater (Medema et al., 2020; Randazzo et al., 2020a). In fact, the so-called  
86 wastewater-based epidemiology has been applied in many developed countries (Ahmed et  
87 al., 2020; Lodder et al., 2020; Betancourt et al., 2021; Gonzalez et al., 2020; Albastaki et  
88 al., 2021; Saththasivam et al., 2021) to help authorities to better understand the situation  
89 and to make decisions regarding lockdowns. In most places, surveillance has been done  
90 in wastewater treatment plants, analyzing therefore, samples that represent the population  
91 of a city or part of it (Ahmed et al., 2020; Gonzalez et al., 2020; Kumar et al., 2020;  
92 Randazzo et al., 2020b; Rimoldi et al., 2020).

93 Rivers, as well as other water bodies, usually receive the discharges of treated wastewater  
94 (although sometimes with insufficient treatment) and, on some occasions, also (illegal)  
95 discharges of raw sewage. In this way, surface water can be impacted by wastewater. At  
96 the same time many of those aquatic environments are used as source water, for the  
97 irrigation of vegetables or for recreational purposes (Chávez-Díaz et al., 2019; Gutiérrez-  
98 Cacciabue et al., 2014; Poma et al., 2012). Previous studies about the microbiological  
99 quality of surface water in Salta, northwest of Argentina, demonstrated that fecal  
100 contamination was considerable in some rivers (Chavez-Díaz et al., 2020; Cruz et al.,  
101 2012; Gutierrez-Cacciabue et al., 2014), and multiple pathogens, including bacteria,  
102 enteric virus, and parasites, were found (Pisano et al., 2018; Poma et al., 2012; Prez et al.,

103 2020), representing a risk for the population in contact with those waters (Poma et al.,  
104 2019).

105 The aim of this work was to evaluate if rivers could be used for SARS-CoV-2 surveillance  
106 to support health authorities. Three rivers from the province of Salta (northwest of  
107 Argentina), two of them receiving the discharges of the two wastewater plants of the city of  
108 Salta (main city in the province, 700,000 inhabitants), were monitored from July to  
109 December 2020 during the first wave of COVID-19. Water samples were physico-  
110 chemically and microbiologically characterized, and SARS-CoV-2 was quantitatively  
111 detected. In addition, two targets linked to human contributions were quantified and used  
112 to normalize the SARS-CoV-2 concentration, which was ultimately compared to the  
113 reported COVID-19 cases.

114

## 115 **2. Materials and methods**

### 116 *2.1. Sampling sites*

117 Three rivers from the province of Salta, northwest of Argentina, were selected for the  
118 study: Arenales, Mojotoro, and La Caldera Rivers (Figure 1). The first two are impacted by  
119 the discharges of the two wastewater treatments plants (WWTP) of the city of Salta  
120 (capital of the province, with 700,000 inhabitants) and vicinities, while the third one is used  
121 as source water upstream and as a recreational ambient downstream.

122 The Arenales River (AR) is the main river that crosses the city of Salta, from west to  
123 southeast, that belongs to the Juramento-Salado watershed in the province of Salta,  
124 northwest of Argentina. While passing across the city, the river receives stormwater,  
125 industrial effluents, and illegal raw sewage (Poma et al., 2012; Lomniczi et al., 2007). Two  
126 sampling points were selected (Figure 1 a): AR-1 (Figure 1 c) and AR-2 (Figure 1 d)

127 located 0.7 km upstream and 0.7 km downstream the southern wastewater treatment plant  
128 (WWTP-S) and the municipal landfill, respectively. Despite the chemical and  
129 microbiological contamination of this river (Lomniczi et al., 2007; Poma et al., 2012; Prez  
130 et al., 2020), it is used for domestic irrigation of vegetables and for recreational purposes.  
131

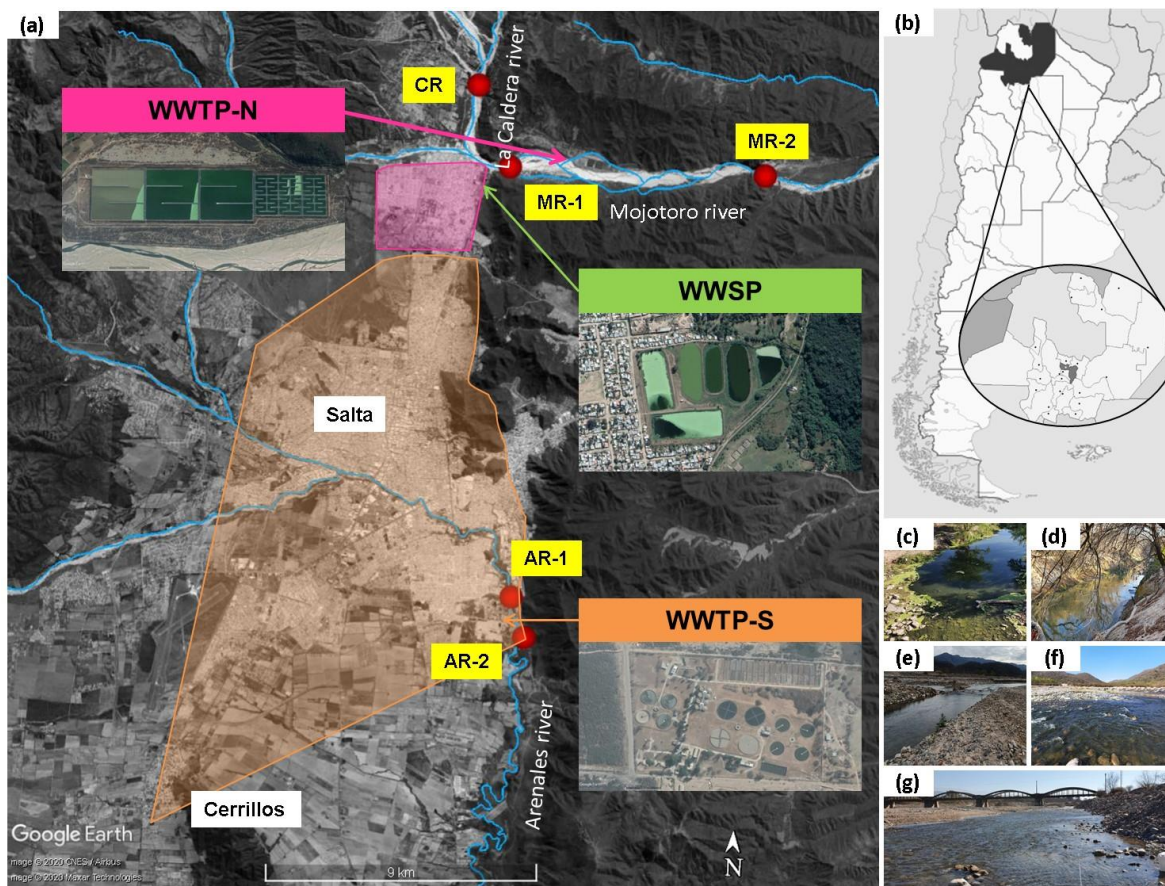

132

133 **Figure 1.** Geographical representation of the sampling sites (a) in Salta city and vicinities  
134 at the Province of Salta, northwest of Argentina (b). Three rivers were monitored: Arenales  
135 River before (AR-1) and after (AR-2) the discharge of the southern wastewater treatment  
136 plant (WWTP-S); Mojotoro River before (MR-1) and after (MR-2) the discharge of the  
137 northern wastewater treatment plant (WWTP-N), and La Caldera River (CR). An old  
138 wastewater stabilization pond (WWSP), out of use, located between CR and MR-1 is also

139 indicated. Shaded pink area corresponds to the coverage of WWTP-N, while shaded  
140 orange area corresponds to the coverage of WWTP-S. Illustrative photographs of the  
141 sampling points are shown: AR-1 (c), AR-2 (d), MR-1 (e), MR-2 (f), and CR (g).

142 La Caldera River (CR) is located 13 km north from the city of Salta. It is used as source  
143 water and for recreational activities. Indeed, it is the most visited river in Salta city's  
144 vicinities because of its landscapes and accessibility. One sampling site (CR) in a  
145 recreational area was selected for this study (Figure 1 e).

146 The Mojotoro River (MR) is originated from the convergence of La Caldera and Vaqueros  
147 Rivers (Figure 1 a). It represents a natural border between Salta city and vicinities, going  
148 from urban to semi-rural areas, and it is mainly used for recreation and gravel extraction.  
149 Two sampling points, 10 km away from each other, were selected for monitoring: MR-1  
150 (Figures 1 a, e) and MR-2 (Figures 1 a, f), located 5 km before and 5 km after the  
151 discharge of the northern wastewater treatment plant (WWTP-N) (Figure 1 a), respectively.  
152 There is also an old, out of use, wastewater stabilization pond (WWSP) located 3.5 km  
153 after CR and 0.7 km before MR-1 (Figure 1 a).

## 154 2.2. *Sampling and characterization of water samples*

155 A total of 15 monitoring campaigns were carried out weekly initially and then every other  
156 week, from the 13 July to 28 December 2020. Water samples were characterized physico-  
157 chemical and microbiologically. Physico-chemical variables: pH, temperature (°C), turbidity  
158 (NTU), and conductivity (mS/cm), were measured in situ using a multiparametric probe  
159 U10 Horiba (Japan). For microbiological characterization, one-liter water samples were  
160 collected in sterile bottles and refrigerated until fecal indicator bacteria (FIB) were analyzed  
161 in the laboratory. Also 20-liter water samples were collected in clean and rinsed plastic



162 carboys at each point and brought to the laboratory for concentration and molecular  
163 analysis.

164 Total (TC) and thermotolerant (TTC) coliforms were determined by the multiple-tube  
165 fermentation method, culturing them on MacConkey broth (Britania, Argentina) at 37 and  
166 44.5 °C for 48 h, respectively (Eaton et al., 2005). *Escherichia coli* (EC) and enterococci  
167 (EN) were enumerated through the Membrane Filter technique (Eaton et al., 2005). *E. coli*  
168 was cultured in modified mTEC Agar (Fluka, USA) at 35 °C for 2 h and 44.5 °C for 22 h  
169 (Method 1603, USEPA 2002a), and enterococci in mE Agar (Difco, USA) at 41 °C for 48 h  
170 and confirmation in Esculin-Iron Agar at 41 °C for 20 min (Method 1106.1, USEPA 2002b).  
171 Results for TC and TTC were expressed as Most Probable Number (MPN) per 100 mL,  
172 while for EC and EN they were expressed as Colony Forming Unit (CFU) per 100 mL.

### 173 2.3. *Water concentration and nucleic acid extraction*

174 Twenty-liter water samples were concentrated down to 80 mL by ultrafiltration using a  
175 disposable hemodialysis hollow fiber cartridge (FX Classix 100, Fresenius Medical Care,  
176 Germany), following a previously optimized and validated protocol for the detection of  
177 enteric viruses (Poma et al, 2012; Rajal et al, 2007). A fraction of the final concentrated  
178 water sample (140 µL) was employed for nucleic acid extraction using a commercial kit  
179 (Puro Virus RNA, Productos Bio-Lógicos, Argentina), producing 50 µL of extract which was  
180 used for the quantitative detection of SARS-CoV-2, Polyomavirus (HPyV) and  
181 Ribonuclease P (RNase P).

### 182 2.4. *Quantitative detection of SARS-CoV-2*

183 The detection of SARS-CoV-2 was performed on the RNA extracts from each  
184 concentrated water sample by RT-qPCR based on the detection of a region of the N gene  
185 (N1 system) validated by the US Centers for Disease Control and Prevention (CDC, 2020).

186 The determination and quantification of the gene N was performed in a StepOne Plus real  
187 time PCR system (Applied Biosystem). The final 20  $\mu$ L reaction volume contained 5  $\mu$ L of  
188 TaqMan Fast virus 1-Step Master Mix 4X (Applied Biosystems), primers and probe  
189 solutions, water (to complete 15  $\mu$ L), and 5  $\mu$ L of template. The final concentrations of  
190 forward and reverse primers were 400 nM each while it was 250 nM for the probe. The  
191 RT-qPCR was initiated with reverse transcription at 50 °C for 5 minutes followed by a step  
192 of 95 °C for 20 seconds and 45 cycles of 95 °C for 15 seconds and 59 °C for 1 minute.  
193 Dilutions of the RNA extract were performed when needed to overcome inhibition.  
194 Reactions were performed in duplicate, simultaneously with a non-template control (MiliQ  
195 water) and DNA plasmid (nCoV-ALL-Control Plasmid, Eurofins) as positive control. A  
196 protocol for rapid digestion with EcoR1 (Promega, USA) was used to linearize the plasmid,  
197 following the manufacturer's instructions.  
198 The standard curve for SARS-CoV-2 quantification ( $y = -3.4700 x + 43.1616$ ;  $R^2 = 0.9820$ ;  
199 amplification efficiency: 94%; dynamic range: 8) was performed with eight 10-fold serial  
200 dilutions, in triplicate, of the DNA plasmid that contains the interest target.

201       2.5.    *Normalization with Human Polyomaviruses (HPyV) and Ribonuclease P*  
202                    *(RNase P) as human input indicators*

203 The viral concentration was expected to show variations along time. These variations  
204 could be due to changing viral discharges into the rivers but also due to fluctuations in the  
205 flow rate, i.e. because of stormwater. Thus, to accurately assess the evolution of SARS-  
206 CoV-2 concentration, without the impact of external factors, two human indicators (HPyV  
207 and RNaseP) were used as normalizers.

208 Human JC (JCPyV) and BK (BKPyV) polyomaviruses were quantitatively detected by qPCR  
209 using the oligonucleotides and reaction conditions described by Barrios et al. (2018). On

210 the other hand, a fragment of the gene encoding for the human Ribonuclease P (RNase P)  
 211 was quantitatively detected by qPCR using the system described by the US Centers for  
 212 Disease Control and Prevention (CDC, 2020).

213 The final volume of each qPCR reaction contained 15  $\mu$ L of reaction mix containing  
 214 SensiFAST Probe HiRox kit 2X (Bioline) and specific primers and probes to reach the final  
 215 concentrations established (a summary of all the oligonucleotides used for all the targets,  
 216 including those for the detection of SARS-CoV-2 is shown in Table 1) and 5  $\mu$ L of template.  
 217 Cycling parameters were 95 °C for 5 minutes for polymerase activation and 45 cycles of 95  
 218 °C for 10 seconds for denaturation and 60 °C for 50 seconds for annealing/extension.

219 Standard curves for HPyV ( $y = -3.656 x + 39.317$ ;  $R^2 = 0.996$ ; amplification efficiency: 88%;  
 220 dynamic range 8) and RNase P ( $-3.71 x + 42.8280$ ;  $R^2 = 0.9991$ ; dynamic range 7)  
 221 markers, were built using 10-fold dilutions of the corresponding plasmid DNA, containing  
 222 the target sequences, in triplicate.

223 **Table 1.** Oligonucleotides: forward (F) and reverse (R) primers and Taq-Man® probes (P)  
 224 used for the detection of SARS-CoV-2 N gene (CDC, 2020), HPyV (Barrios et al., 2018)  
 225 and RNase P gene (CDC, 2020).

| Target                         | Oligonucleotide | Sequence 5' - 3'                      | Final concentration (nM) |
|--------------------------------|-----------------|---------------------------------------|--------------------------|
| N1 system of SARS-CoV-2 gene N | 2019-nCoV_N1-F  | GACCCCAAATCAGCGAAAT                   | 400                      |
|                                | 2019-nCoV_N1-R  | TCTGGTTACTGCCAGTTGAATCTG              | 400                      |
|                                | 2019-nCoV_N1-P  | FAM-ACCCCGCATTACGTTTGGTGGACC-BHQ1     | 250                      |
| HPyV JC-BK                     | S1-JC-BK (F)    | CTGCTGCTGCCACAGGATT                   | 500                      |
|                                | AS2-JC-BK (R)   | CCTCTACAGTAGCAAGGGATGCA               | 500                      |
|                                | P-JC-BK         | FAM-AGCAGCAGCCTCYCCAGCAGCAATTCAGC-BHQ | 250                      |

|         |      |                                       |     |
|---------|------|---------------------------------------|-----|
| RNase P | RP-F | AGATTTGGACCTGCGAGCG                   | 500 |
|         | RP-R | GAGCGGCTGTCTCCACAAGT                  | 500 |
|         | RP-P | HEX-TTCTGACCTGAAGGCTCTGCGCG–<br>BHQ-1 | 250 |

226

227 All the extracted nucleic acids from the concentrated water samples were analyzed for  
 228 HPyV and RNaseP, by duplicate, using positive (plasmid) and negative (ultrapure water)  
 229 controls. These results were used for the normalization of the SARS-CoV-2  
 230 concentrations; three alternative normalizations were assessed, as follows:

231 Alternative 1: 
$$CN1_{CoV} = \frac{C_{CoV}}{C_{HPyV}} \quad (1)$$

232

233 Alternative 2: 
$$CN2_{CoV} = \frac{C_{CoV}}{C_{RNaseP}} \quad (2)$$

234

235 Alternative 3: 
$$CN3_{CoV} = \frac{C_{CoV}}{\sqrt{\frac{C_{HPyV}}{C_{a,HPyV}} \times \frac{C_{RNaseP}}{C_{a,RNaseP}}}} \quad (3)$$

236 Where  $C$  (gc/mL) is the concentration and subindexes  $CoV$  (as for SARS-CoV-2),  $HPyV$   
 237 and  $RNaseP$  indicate the targets;  $C_a$  (gc/mL) is the average concentration and  $C_N$  (gc/mL)  
 238 is the normalized concentration. The super index ( $i$ ) ( $i = 1, 2, 3$ ) indicates the normalization  
 239 alternative.

## 240 2.6. COVID-19 cases

241 Reported COVID-19 cases for the city of Salta were compiled and the prior two-weeks  
 242 accumulated amount were assigned to each monitoring date to compare the  
 243 epidemiological curve to the evolution of the viral concentration in the Arenales River. The  
 244 reason for choosing this river was that it crosses the city receiving the impact of various  
 245 human activities (domestic and industrial) and also, it receives the discharges of the main

246 wastewater treatment plant (WWTP-S) (covers 85% of the population), which is outdated  
247 and not sufficient for treating the volume of a fast-growing city.

## 248 2.7. Statistical analyses

249 Physico-chemical variables (temperature, pH, conductivity, and turbidity) measured along  
250 the monitoring campaigns were compiled to show descriptive statistics: mean and standard  
251 deviation, median and range of variability (minimum – maximum).

252 To assess data variability during the monitoring campaign within each river and regarding  
253 the impact due to SARS-CoV-2, different statistical tests were run.

254 Most analyses were carried out using non-parametric tests, due to the non-normal  
255 distribution of the data ( $p < 0.001$ ). Only the correlation between concentrations of HPyV  
256 and RNase P was carried out with a parametric test (Pearson) as both datasets showed  
257 normal distribution. Normality was tested by the Shapiro–Wilks W-test (Shapiro and  
258 Francia, 1972).

259 Kruskal-Wallis test (non-parametric) was performed with the physico-chemical and  
260 microbiological variables measured to compare all the sampling points. Different letters  
261 were assigned when there were significant differences within the variables between the  
262 sampling points with  $p$ -values  $< 0.05$ .

263 Correlations between all the physico-chemical variables, and fecal indicator bacteria and  
264 SARS-CoV-2 concentrations measured for all the sampling points were assessed by  
265 Spearman test (non-parametric). This test was also applied to all the same variables for  
266 each sampling point. Correlations were considered significant when the probabilities ( $p$ )  
267 were lower than 0.05 and they were arbitrary considered weak when coefficients were  
268 lower than 0.40, moderate when were between 0.40 and 0.75, and strong when were  
269 higher than 0.75.

270 A Cluster Analysis (CA) and a Linear Discriminant Analysis (DA) were applied using nine  
271 variables (TC, TTC, EC, EN, SARS-CoV-2, T, conductivity, pH and turbidity) to assess the  
272 behavior of the data in a multivariate sense. The CA aimed to search similarities between  
273 sampling points. This multivariate statistical test was performed by the Ward Method.  
274 Euclidean distances were calculated for each case. The DA was applied to distinguish  
275 between sampling points. The goal is to discriminate two or more groups of objects by  
276 maximizing their differences (Di Renzo et al., 2016). All the variables were standardized  
277 before the multivariate performance, to eliminate the effect of scale.

278 Statistical analyses were run with the InfoStat software (Di Rienzo et al., 2016) and RStudio  
279 version 4.0.0 (Ihaka and Gentleman, 1996; R Development Core Team, 2005; RStudio  
280 Team, 2020; Wickham, 2009).

281 Finally, the parametric Pearson's test was performed to evaluate if there was correlation  
282 between the concentrations of HPyV and RNaseP. In addition, Spearman test was  
283 performed to assess for correlation between the evolution of the concentration of SARS-  
284 CoV-2 in the Arenales River, at AR-1 and AR-2, and the number of active reported cases  
285 in Salta city. Then the test was applied for the normalized SARS-CoV-2 concentration at  
286 AR-2 and the number of cases.

287

### 288 **3. Results**

289 A total of 15 sampling events were carried out from July to December of 2020 in three  
290 rivers, monitoring a total of five points: AR-1 and AR-2 at the Arenales River, CR at La  
291 Caldera River, and MR-1 and MR-2 at Mojotoro River.

#### 292 *3.1. Physico-chemical characterization of water samples*

293 Four physico-chemical variables (temperature, pH, conductivity, and turbidity) were  
294 measured in water (Table 2). Water temperature (7.2 - 23.8 °C) was directly affected by  
295 environmental temperature (5.0 - 25.0 °C) (July to middle September is winter and middle  
296 September to middle December is spring in the South Hemisphere), as expected.  
297 Although the maximum temperatures were similar for all the rivers, the minimum values  
298 were higher for AR-1 and AR-2 (Arenales River is in the middle of the city) compared to  
299 those from CR, MR-1 and MR-2 which are in the vicinities of Salta, in open space and  
300 more exposed to the wind and elements.

301 **Table 2.** Physico-chemical variables measured in surface water, along 15 sampling  
302 events, in the Arenales River at AR-1 and AR-2 (before and after the discharges of the  
303 southern wastewater treatment plant, WWTP-S, respectively; distance between AR-1 and  
304 AR-2 is 1.4 km and WWTP-S is separated 0.7 km from each), in La Caldera River (CR),  
305 and in the Mojotoro River at MR-1 (after an old wastewater stabilization pond and before  
306 the discharges of the northern wastewater treatment plant, WWTP-N) and MR-2 (after the  
307 discharges of the WWTP-N; distance between MR-1 and MR-2 is 10 km and WWTP-N is 5  
308 km away from each). K-W: Bonferroni Post Hoc test from Kruskal Wallis. Medians with  
309 different letters are significantly different ( $p < 0.05$ ).

| Variables        | Sampling points | Mean $\pm$ SD    | Median | Range         | K-W |
|------------------|-----------------|------------------|--------|---------------|-----|
|                  |                 |                  |        | (min-max)     |     |
| Temperature (°C) | AR-1            | 17.41 $\pm$ 3.99 | 16.30  | 12.10 - 23.50 | AB  |
|                  | AR-2            | 19.23 $\pm$ 3.19 | 18.40  | 14.70 - 23.80 | A   |
|                  | CR              | 15.83 $\pm$ 4.73 | 14.30  | 7.20 - 23.80  | C   |
|                  | MR-1            | 15.69 $\pm$ 4.18 | 15.00  | 8.00 - 22.50  | A   |
|                  | MR-2            | 16.28 $\pm$ 4.88 | 16.00  | 7.80 - 23.80  | BC  |

|                    |                         |               |             |                |             |
|--------------------|-------------------------|---------------|-------------|----------------|-------------|
| pH                 | AR-1                    | 8.07 ± 0.27   | 8.12        | 7.64 - 8.54    | E           |
|                    | AR-2                    | 7.90 ± 0.12   | 7.91        | 7.70 - 8.09    | E           |
|                    | CR                      | 8.45 ± 0.28   | 8.46        | 7.89 - 8.82    | D           |
|                    | MR-1                    | 7.96 ± 0.40   | 7.94        | 6.99 - 8.90    | D           |
|                    | MR-2                    | 8.24 ± 0.32   | 8.24        | 7.32 - 8.63    | D           |
|                    | Conductivity<br>(mS/cm) | AR-1          | 0.46 ± 0.07 | 0.48           | 0.31 - 0.54 |
|                    | AR-2                    | 0.58 ± 0.07   | 0.59        | 0.41 - 0.74    | G           |
|                    | CR                      | 0.21 ± 0.03   | 0.20        | 0.17 - 0.27    | F           |
|                    | MR-1                    | 0.24 ± 0.01   | 0.24        | 0.21 - 0.27    | F           |
|                    | MR-2                    | 0.25 ± 0.02   | 0.24        | 0.20 - 0.28    | F           |
| Turbidity<br>(NTU) | AR-1                    | 17.07 ± 32.51 | 8.00        | 4.00 - 134.00  | H           |
|                    | AR-2                    | 88.27 ± 28.44 | 80.00       | 55.00 - 159.00 | J           |
|                    | CR                      | 16.07 ± 13.78 | 13.00       | 5.00 - 56.00   | HI          |
|                    | MR-1                    | 11.47 ± 5.57  | 10.00       | 5.00 - 26.00   | HI          |
|                    | MR-2                    | 16.27 ± 5.36  | 16.00       | 5.00 - 26.00   | I           |

310

311 Kruskal-Wallis test was performed with physico-chemical variables measured in the five  
 312 sampling points analyzed. The sampling points CR, MR-1 and MR-2 were similar except  
 313 for the temperature that was different in MR-1. The two monitoring points at the Arenales  
 314 River (AR-1 and AR-2; distance was 1.4 km, the WWTP-S was 0.7 km away from each)  
 315 only showed significant differences in the turbidity, which was much higher in AR-2,  
 316 probably due to the discharges of the WWTP-S, also reported in a previous work (Poma et  
 317 al, 2012).

318

319



320           3.2.    *Bacterial characterization*

321    The highest concentrations of all FIBs were found in the Arenales River, followed by  
322    Mojotoro River and La Caldera River (Figure 2). In general, variability in bacteria  
323    concentrations (within two orders of magnitude) was lower in AR-1 and AR-2 than in the  
324    other sampling points (Figure 2). Conversely, the concentrations of total and thermotolerant  
325    coliforms were highly variable for MR-1, MR-2, and CR.

326    Bacteria concentrations in Arenales River exceeded  $10^4$  CFU or MPN per 100 mL and  
327    furthermore, they surpassed the acceptable limits for *E. coli* and enterococci (235 CFU/100  
328    mL and 71 CFU/100 mL, respectively, USEPA 2012) in all the samples analyzed. The point  
329    AR-2, 700 m downstream from AR-1, was highly impacted by fecal contamination of  
330    untreated or insufficiently treated wastewater effluents from the WWTP-S ( $p < 0.05$  for all  
331    the FBI) (Table 3).

332    Regarding Mojotoro River, bacteria concentrations were similar in both sampling sites (Table  
333    3) showing that the effluents of the WWTP-N have no impact on the microbial quality of  
334    water. However, the concentration of *E. coli* and enterococci exceeded the recreational limits  
335    in most of the samples (67 and 80% for MR-1, respectively, and 53 and 33% for MR-2,  
336    respectively). In contrast, La Caldera River showed the best water quality, appropriate for  
337    recreational activities. In fact, all the samples analyzed (15 in total) were within the accepted  
338    values for *E. coli*; however, one of them exceeded the limit for enterococci.

339

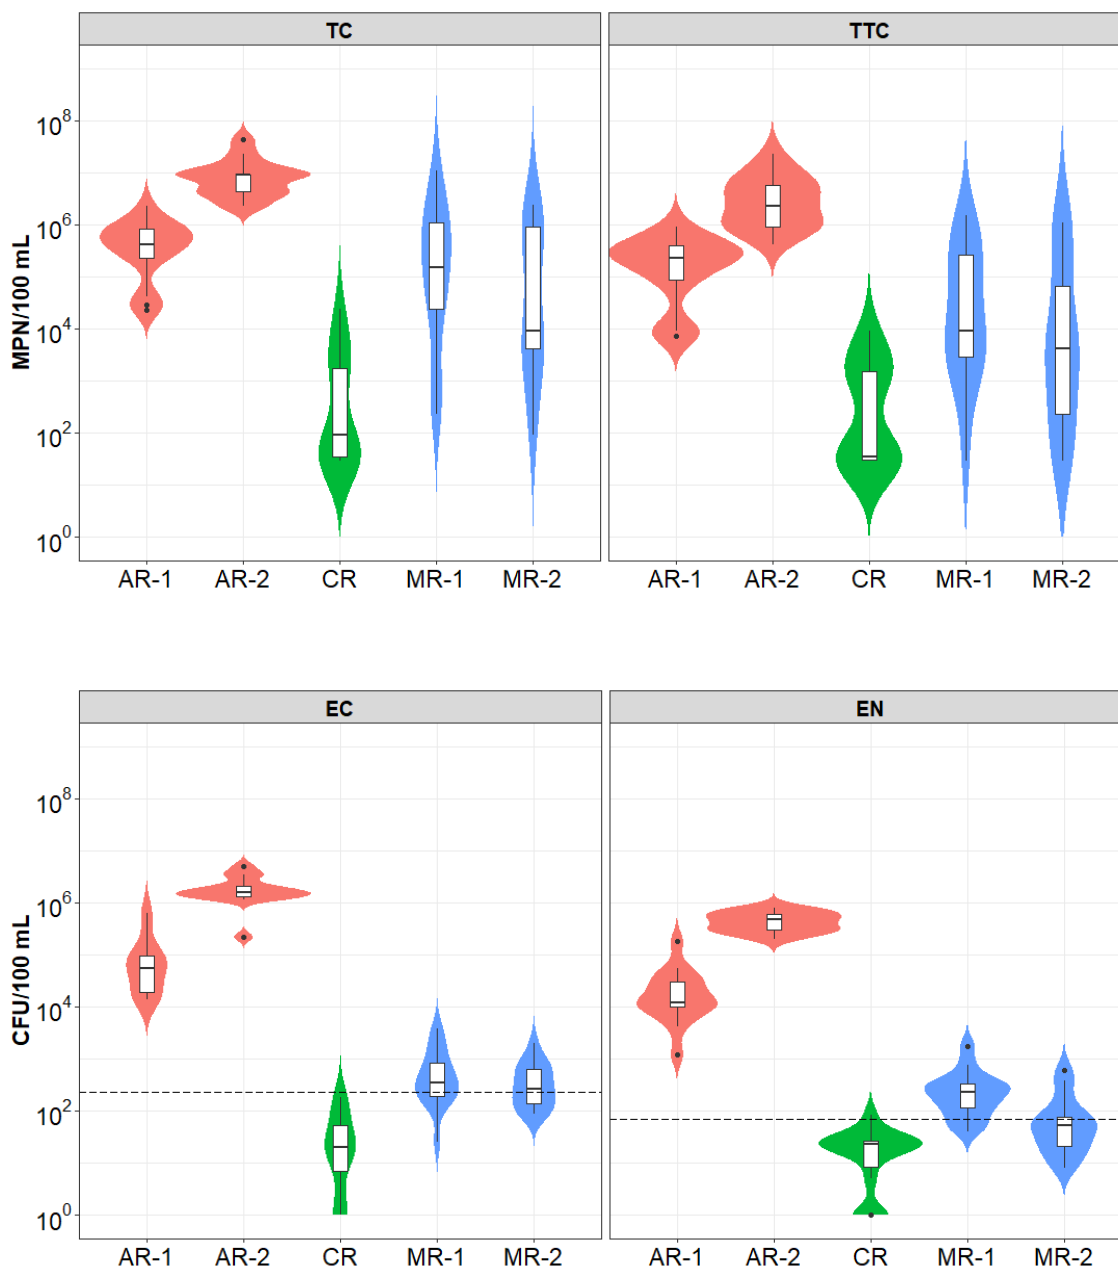

340

341

342 **Figure 2.** Violin plots representing indicator bacteria determined in 15 monitoring events in  
343 five different sampling points (75 samples in total): AR-1 and AR-2 in the Arenales River  
344 (before and after the discharges of the southern wastewater treatment plant, respectively),  
345 CR in La Caldera River, and MR-1 and MR-2 in the Mojotoro River (before and after the  
346 discharges of the northern wastewater treatment plant, respectively). The concentrations  
347 of total (TC) and thermotolerant coliforms (TTC) are expressed as the Most Probable

348 Number per 100 mL, while those of *E. coli* (EC) and *Enterococcus* sp. (EN) are in Colony  
349 Forming Units (CFU) per 100 mL. Violin shapes show the data kernel probability with the  
350 boxplots embedded. Boxplots show the interquartile range (IQR) in boxes divided by  
351 median values (horizontal lines) with whiskers depicting  $\pm 1.5$  IQR and outliers as points.  
352 The segmented horizontal lines represent the limit values accepted by legislation for  
353 recreational water (USEPA, 2012).

354 **Table 3.** Bonferroni Post Hoc test from Kruskal Wallis for fecal indicator bacteria (total and  
355 thermotolerant coliforms, *E. coli*, and enterococci) determined in five sampling points: CR in  
356 La Caldera River, MR-1 and MR-2 in Mojotoro River, and AR-1 and AR-2 in Arenales River.  
357 Medians with different letters for each variable are significantly different ( $p < 0.05$ ).

|      | Total<br>coliforms | Thermotolerant<br>coliforms | <i>E. coli</i> | Enterococci |
|------|--------------------|-----------------------------|----------------|-------------|
| CR   | A                  | A                           | A              | A           |
| MR-1 | A                  | A                           | B              | B           |
| MR-2 | A                  | A                           | B              | AB          |
| AR-1 | B                  | B                           | C              | C           |
| AR-2 | B                  | C                           | C              | C           |

358

### 359 3.3. Quantification of SARS-CoV-2, HPyV and RNase P

360 All the samples (75 in total) collected during the 15 sampling events (from July to  
361 December 2020, during the first wave of COVID-19) at five different points in three rivers,  
362 were concentrated, the nucleic acids were extracted, and then analyzed for SARS-CoV-2,  
363 HPyV and RNase P (Figure 3). In La Caldera River, from the three targets evaluated only  
364 SARS-CoV-2 was found in around half of the samples (53.3% samples were non-detects)

365 and in those cases the viral concentrations were lower than  $10^5$  gc/L. The same occurred  
366 in the Mojotoro River where 7 and 6 out of 15 (46.6 and 40.0%, respectively) samples  
367 were non detects at MR-1 and MR-2, respectively. However, HPyV was also detected in  
368 that river in both sampling points, in 14 and in 10 (out of 15) samples at MR-1 and MR-2,  
369 respectively. The HPyV was detected in all the samples in Arenales River, in both  
370 sampling points, showing the impact of human contamination. This effect was also seen  
371 through the detection of RNase P that was only found in AR-2 samples. While SARS-CoV-  
372 2 was not detected during the first five monitoring campaigns in AR-1, it was quantified in  
373 all samples collected at AR-2. The two targets selected for tracing human contamination  
374 showed a similar behavior (coefficient was 0.7228;  $p = 0.0021$ ; positive strong correlation)  
375 along time. However, the concentrations of HPyV were around one order of magnitude  
376 higher than those of RNase P, which may be the reason for RNase P not being found  
377 consistently in other sites (average ratio HPyV/RNaseP was  $15.8 \pm 6.4$ , without  
378 considering one outlier on 27 July, where the ratio was 299.3).

379

380

381

382

383

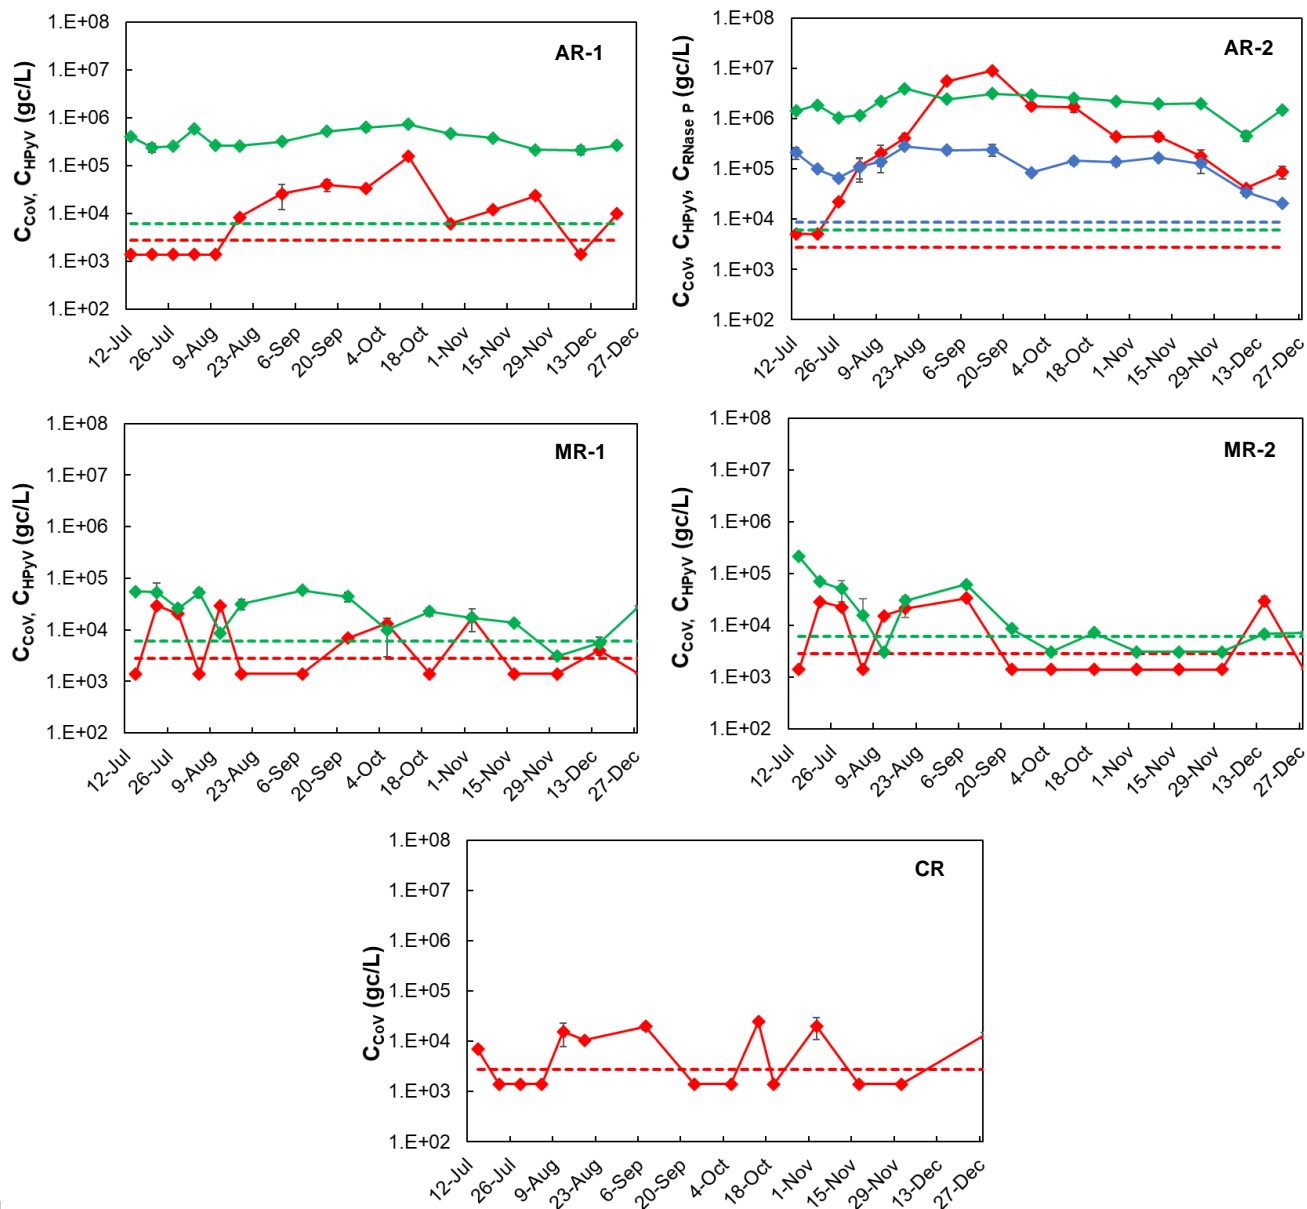

384

385 **Figure 3.** Evolution of SARS-CoV-2 ( $C_{\text{CoV}}$ , red solid line), human polyomavirus ( $C_{\text{HPyV}}$ ,  
 386 green solid line), and RNase P ( $C_{\text{RNase P}}$ , blue solid line) concentrations, determined in five  
 387 sampling points: AR-1 and AR-2 in Arenales River, MR-1 and MR-2 in Mojotoro River, and  
 388 CR in La Caldera River, from July to December 2020 (15 sampling events). Dashed lines  
 389 represent the limit of detection (LOD) for SARS-CoV-2 (red), HPyV (green) and RNase P  
 390 (blue). Non detects were arbitrarily represented as LOD/2. Values plotted are the average

391 of duplicates and error bars correspond to the standard deviation (some bars are too small  
392 to be seen). Concentrations are expressed in gene copies per liter (gc/L).

### 393 3.4. *Relationship between water quality and SARS-CoV-2 concentration*

394 Spearman correlation was evaluated using all the physico-chemical, FIBs and SARS-CoV-  
395 2 concentration data, including all the sampling points (Supplementary Information, Table  
396 S1). Temperature was the only variable that did not show any correlation. Positive strong  
397 correlations were found between pH and COND, TURB and FIBs, and among FIBs.  
398 Regarding CoV, also positive strong correlations were confirmed with pH and COND, while  
399 they were moderate with TURB and all FIBs (Supplementary Information, Table 1).

400 When Spearman correlation was performed for each sampling point instead, positive  
401 strong or moderate correlations were found ( $p < 0.05$ ) between COND and pH (and with  
402 temperature for MR-2 only) and also between TC, TTC and EC for all the sampling points  
403 (Table 4). In all cases, except for MR-2, there were positive moderate correlations ( $p <$   
404  $0.05$ ) between TURB and at least two FIBs. Only for AR-1 and AR-2 positive moderate  
405 correlations ( $p < 0.05$ ) were found between CoV and pH, CoV and TURB, and EN and  
406 another FIB (Table 4).

407 **Table 4.** Coefficients and probabilities (below and above the main diagonal, respectively)  
408 from Spearman correlation test using the physico-chemical variables, fecal indicator  
409 bacteria and SARS-CoV-2 concentration (CoV) for each sampling point (SP): AR-1 and  
410 AR-2 in Arenales River; CR in La Caldera River; MR-1 and MR-2 in Mojotoro River. Only  
411 significant correlations ( $p < 0.05$ ) are shown and those that are strong are indicated in  
412 bold. Physico-chemical variables: temperature (T), pH, conductivity (COND), turbidity  
413 (TURB). Fecal indicator bacteria: total coliforms (TC), thermotolerant coliforms (TTC), *E.*  
414 *coli* (EC), enterococci (EN).

| SP          | T           | pH   | COND                 | TURB        | TC   | TTC         | EC                   | EN                   | CoV                  |  |
|-------------|-------------|------|----------------------|-------------|------|-------------|----------------------|----------------------|----------------------|--|
| <b>AR-1</b> | T           |      |                      |             |      |             |                      |                      |                      |  |
|             | pH          |      | $1.8 \times 10^{-4}$ |             |      |             |                      |                      | $4.6 \times 10^{-3}$ |  |
|             | COND        |      | <b>1</b>             |             |      |             |                      |                      | $4.6 \times 10^{-3}$ |  |
|             | TURB        |      |                      |             |      |             | 0.01                 |                      |                      |  |
|             | TC          |      |                      |             |      | 0.04        | 0.04                 |                      |                      |  |
|             | TTC         |      |                      |             |      | 0.53        |                      |                      |                      |  |
|             | EC          |      |                      |             | 0.65 | 0.54        |                      |                      | 0.03                 |  |
|             | EN          |      |                      |             |      |             |                      | 0.57                 |                      |  |
|             | CoV         |      | 0.69                 | 0.69        |      |             |                      |                      |                      |  |
|             | <b>AR-2</b> | T    |                      |             |      |             |                      |                      | 0.01                 |  |
| pH          |             |      | $1.8 \times 10^{-4}$ |             |      |             |                      |                      | $2.3 \times 10^{-3}$ |  |
| COND        |             |      | <b>1</b>             |             |      |             |                      |                      | $2.3 \times 10^{-3}$ |  |
| TURB        |             |      |                      |             |      |             |                      | 0.05                 |                      |  |
| TC          |             |      |                      |             |      |             |                      | 0.02                 |                      |  |
| TTC         |             |      |                      |             |      |             |                      | $3.7 \times 10^{-3}$ |                      |  |
| EC          |             |      |                      |             |      |             | 0.70                 |                      |                      |  |
| EN          |             | 0.66 |                      |             | 0.51 | 0.59        |                      |                      |                      |  |
| CoV         |             |      | <b>0.81</b>          | <b>0.81</b> |      |             |                      |                      |                      |  |
| <b>CR</b>   |             | T    |                      |             |      |             |                      |                      |                      |  |
|             | pH          |      | $1.8 \times 10^{-4}$ |             |      |             |                      |                      |                      |  |
|             | COND        |      | <b>1</b>             |             |      |             |                      |                      |                      |  |
|             | TURB        |      |                      |             |      | 0.01        | 0.04                 |                      |                      |  |
|             | TC          |      |                      |             | 0.63 |             | $1.1 \times 10^{-6}$ | 0.02                 |                      |  |
|             | TTC         |      |                      |             | 0.55 | <b>0.92</b> |                      | $4.7 \times 10^{-3}$ |                      |  |

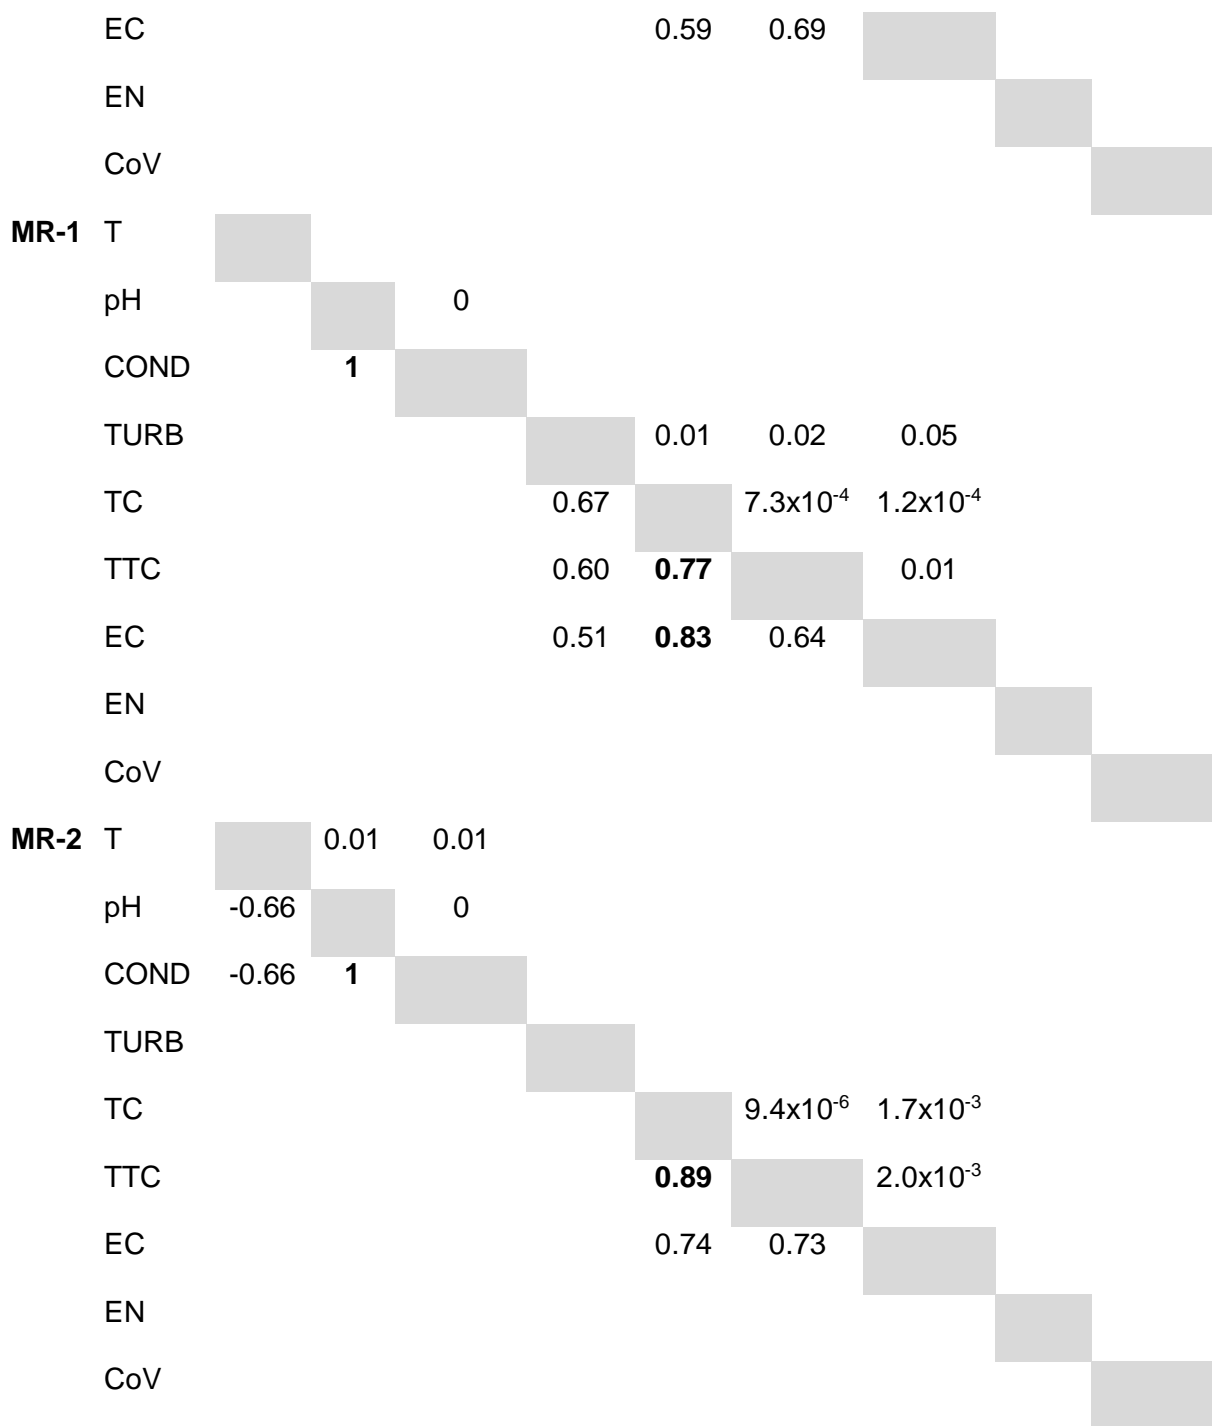

415

416 Cluster analysis including all the variables measured for a total of 75 water samples from  
 417 five sampling points was performed and the Euclidean distances were determined  
 418 (cophenetic correlation was 0.906) (Figure 4). The most similar sampling points were MR-



419 1 and MR-2 (Euclidean distance was 0.69), verifying once again that the Mojotoro River  
420 was not negatively impacted by the discharges of the WWTP-N. Conversely, the most  
421 different sampling points were CR and AR-2 (Euclidean distance was 6.99), in agreement  
422 with other observations, that CR was the point with the best water quality and AR-2 the  
423 most impacted one by the discharges of the WWTP-S.

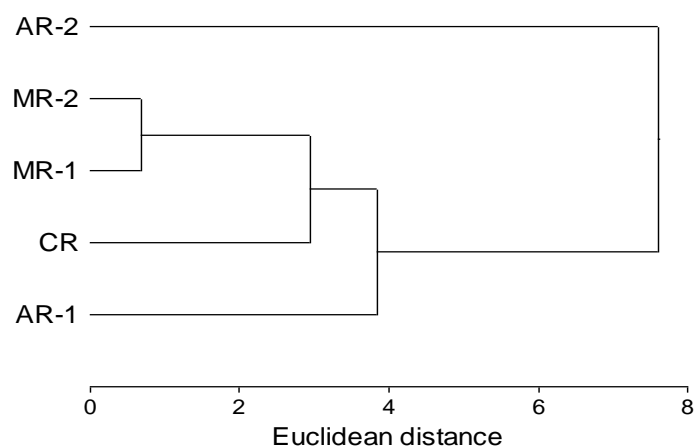

424

425 **Figure 4.** Cluster analysis performed with nine variables (temperature, pH, conductivity,  
426 turbidity, and concentrations of total and thermotolerant coliforms, *E. coli*, enterococci and  
427 SARS-CoV-2) measured in a total of 75 water samples collected in five sampling points:  
428 AR-1 and AR-2 in the Arenales River, MR-1 and MR-2 in the Mojotoro River, and CR in La  
429 Caldera River, from July to December 2020 (15 sampling events).

430

431 The discriminant analysis performed with nine the variables measured in 75 water samples  
432 along 15 sampling events showed two main groups (Figure 5). At the right side there were  
433 those samples from the Arenales River, where AR-1 was also discriminated from AR-2,  
434 due to the high microbial contamination. The second group, at the left side, included the

435 samples from Mojotoro River, with MR-1 and MR-2 mingled together, slightly separated  
436 from those from Caldera River, which was the one with best microbial water quality.

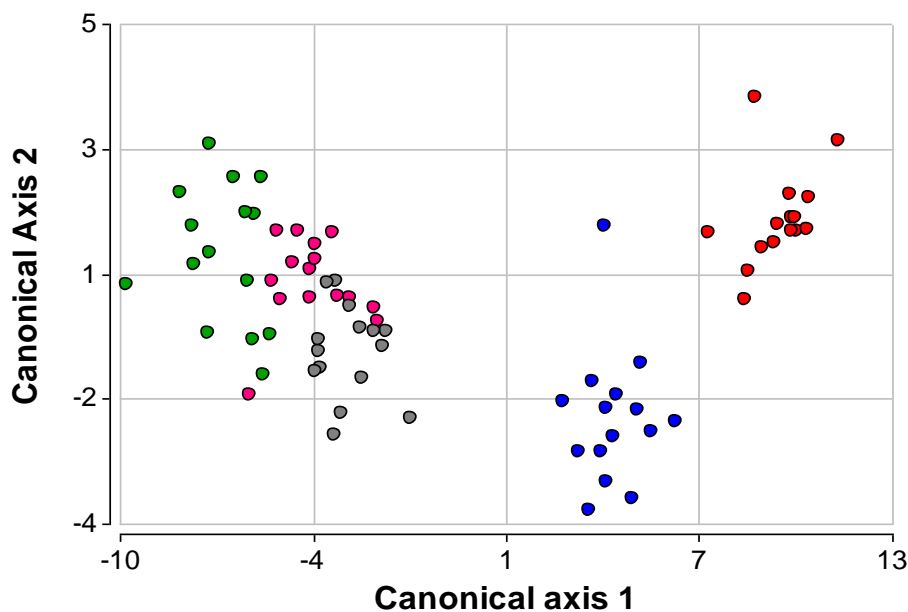

437

438 **Figure 5.** Plots of the first two axes (with eigenvalues higher than 1, explaining 97.7% of  
439 the accumulated variance) obtained with a linear discriminant analysis conducted with nine  
440 variables: temperature, pH, conductivity, turbidity, and concentrations of total coliforms,  
441 thermotolerant coliforms, *E. coli*, enterococci, and SARS-CoV-2. A total of 75 water  
442 samples were collected in five sampling points: AR-1 (red circles) and AR-2 (blue circles)  
443 in the Arenales River, MR-1 (gray circles) and MR-2 (pink circles) in the Mojotoro River,  
444 and CR (green circles) in La Caldera River, from July to December 2020 (15 sampling  
445 events).

446

447 3.5. *Comparison between SARS-CoV-2 concentration and reported COVID-19*  
448 *cases*

449 The total of COVID-19 reported cases in the city of Salta, accumulated for 14 days before  
450 each monitoring campaign, were assigned to that sampling date. The evolution of the  
451 number of cases in Salta city was confronted with the SARS-CoV-2 concentration found in  
452 the Arenales River (Figure 6). This was not performed for the Mojotoro and La Caldera  
453 Rivers as SARS-CoV-2 was detected in around half of the samples, following no pattern,  
454 in low concentration, while the number of cases were constantly increasing.

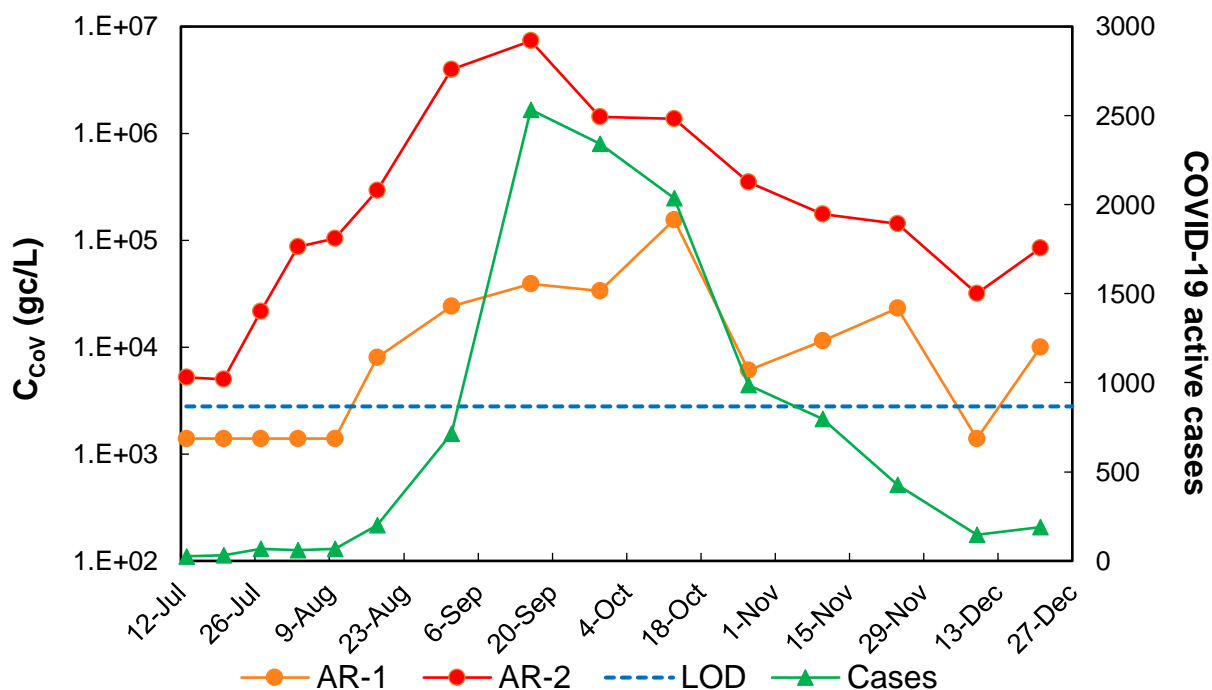

455

456 **Figure 6.** Evolution of SARS-CoV-2 concentration ( $C_{CoV}$ ) in the Arenales River at two  
457 sampling points: AR-1 and AR-2 before and after the southern wastewater treatment plant,  
458 respectively, and of the number of COVID-19 active cases accumulated for 14 days before  
459 sampling. LOD: limit of detection for SARS-CoV-2 in surface water. Non-detects were  
460 arbitrarily represented as LOD/2.

461

462 The viral concentration curve anticipated the epidemiological one. The ratio between the  
463 viral concentration and the number of active cases (14 days before) was variable, being 32  
464 gc/mL/case the average for AR-1 and 1099 gc/mL/case the average for AR-2. The latest  
465 was a consequence of a higher fecal content in AR-2 due to the WWTP discharges in the  
466 river and was highly influenced by the extreme values. In fact, at the beginning and  
467 towards the end of the epidemiological curve the ratio was around 281 gc/mL/case while it  
468 was 2034 gc/mL/case during the two months (August-September) when the viral  
469 dissemination was higher.

470 Spearman correlation coefficient indicated a positive association between the number of  
471 cases and the viral concentrations in the Arenales River, at AR-1 ( $\rho = 0.89$ ;  $p = 0.00001$ )  
472 and at AR-2 ( $\rho = 0.89$ ;  $p = 0.00084$ ).

### 473 3.6. *Normalization of the SARS-CoV-2 concentration*

474 The experimental concentration of SARS-CoV-2, although is calculated based on the  
475 detection of the gene of interest in water samples, is subject to fluctuations due to  
476 variations in the flow rate, i.e. from precipitations or from discharges of the wastewater  
477 plant. One strategy to compensate for that, thus, to help the data to get closer to the real  
478 situation, is to normalize the data, with some variable that accounts for the human input in  
479 this case. Two targets, T antigen for HPyV and RNase P, linked to human contamination  
480 were selected for that. Therefore, the concentration of SARS-CoV-2 in the Arenales River  
481 was normalized following three different alternatives, including the concentration of HPyV  
482 (Alternative 1), the concentration of RNase P (Alternative 2) and a combination of both  
483 (Alternative 3) (Figure 7).

484

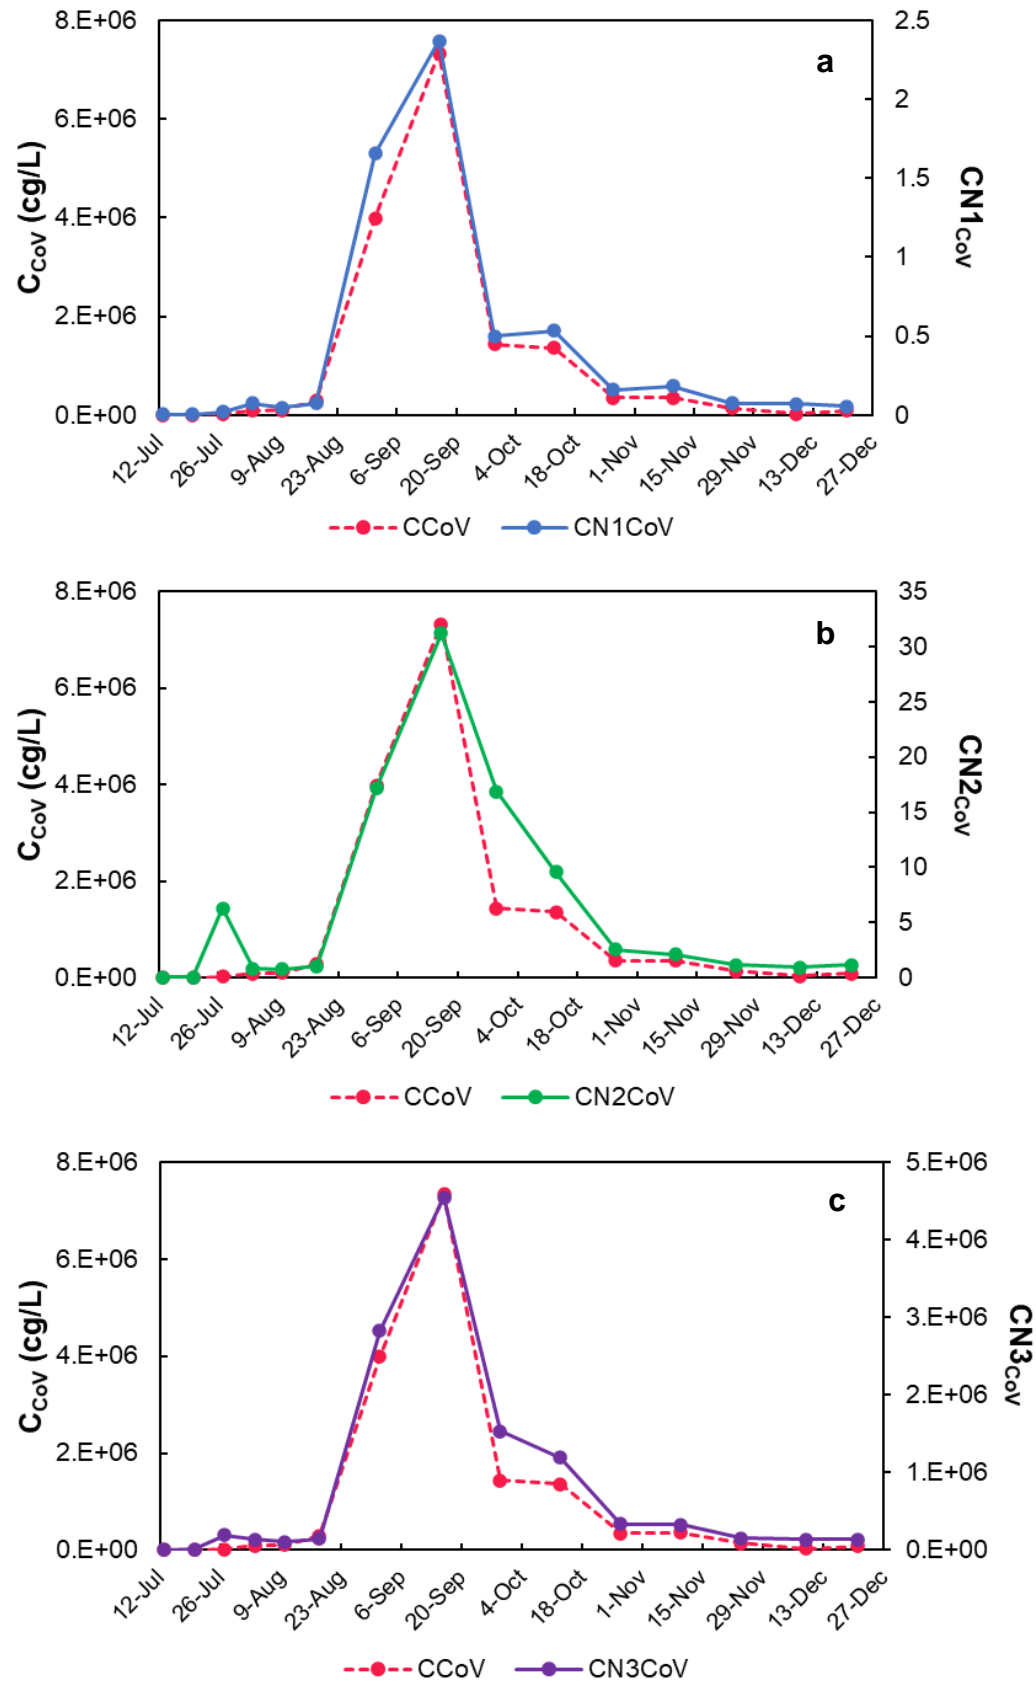

486 **Figure 7.** Concentration of SARS-CoV-2 experimentally determined ( $C_{CoV}$ ) at AR-2 in  
487 Arenales River and the normalized concentration using three different alternatives: (a)  
488 Alternative 1 ( $CN1_{CoV}$ ), using the concentration of human polyomavirus (HPyV), according  
489 to equation 1, (b) Alternative 2 ( $CN2_{CoV}$ ), using the concentration of RNase P, according to  
490 equation 2, and (c) Alternative 3 ( $CN3_{CoV}$ ), using the concentration of HPyV and RNase P,  
491 according to equation 3.

492

493 Regarding the three alternatives for normalization of the SARS-CoV-2 concentration  
494 evaluated, the first one was as the ratio with the concentration of human polyomavirus  
495 (equation 1), in which case the shape of the curve was not modified. However, the scale of  
496 the resulting number was too small, and the sense of the viral concentration magnitude  
497 was lost, and the units were (gc of SARS-CoV-2/gc of HPyV). The latest also happened  
498 when the ratio of SARS-CoV-2 was calculated with RNase P (equation 2), being the units  
499 (gc of SARS-CoV-2/gc of RNase P); however, the shape of the resulting curve changed a  
500 bit due to the fluctuations of RNase P concentration. Instead, the third way of performing  
501 the normalization was using the two normalizers (HPyV and RNase P), according to  
502 equation 3. In this case, the shape of the experimental SARS-CoV-2 concentration  
503 remained constant, and the normalized values kept the sense of the concentration  
504 magnitude as well as the proper units. Thus, the normalized concentration of SARS-CoV-  
505 2, obtained using both HPyV and RNase P, was selected and compared to the number of  
506 reported COVID-19 cases in the city (Figure 8). A strong positive correlation was found by  
507 Spearman test between the number of COVID-19 cases and the normalized (alternative 3)  
508 viral concentrations at AR-2 ( $\rho = 0.93$ ;  $p = 0.00054$ ).

509

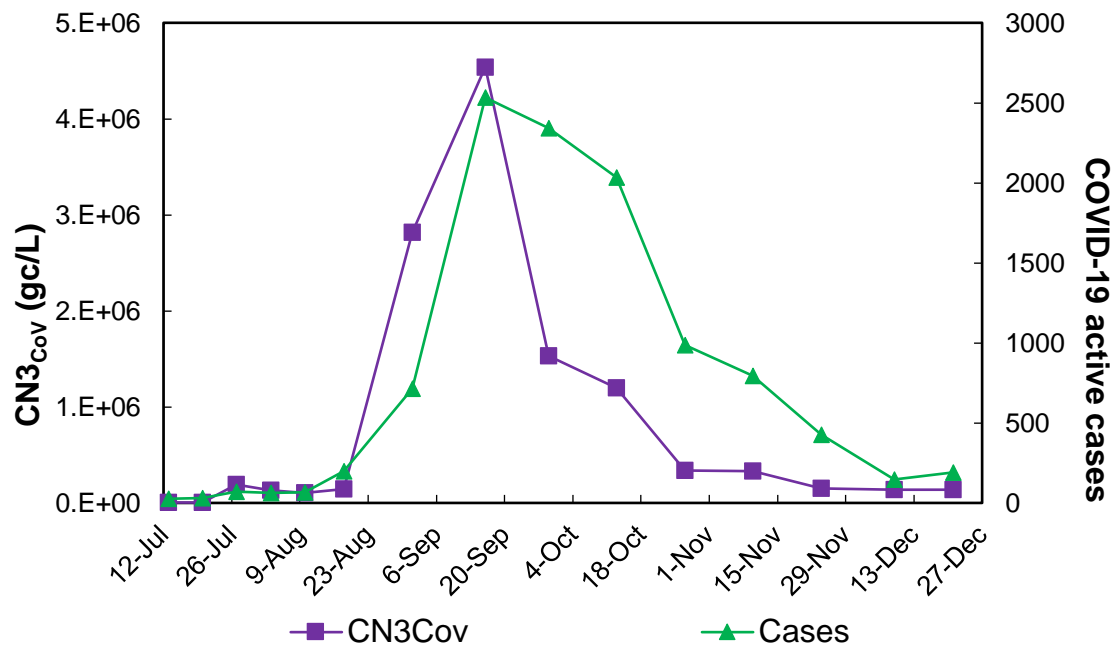

510

511 **Figure 8.** Evolution of the normalized concentration of SARS-CoV-2 (gc/L) (CN3<sub>CoV</sub>,  
512 according to equation 3) in the Arenales River at AR-2 and the accumulated reported  
513 COVID-19 cases, from the 12 July to 27 December 2020 during the first wave of COVID-  
514 19 in the city of Salta, Argentina.

515

#### 516 **4. Discussion**

517 A dataset including experimental values for physico-chemical (four variables) and  
518 microbiological (four fecal indicator bacteria and SARS-CoV-2 concentration) variables  
519 from a total of 75 water samples from five sampling points was used to performed various  
520 bi- and multi-variable analyses. These allowed us to compare among sampling points  
521 located in the same or different rivers, to evaluate correlations, and to find the most similar  
522 and different points.

523 The results from the monitoring from July to December 2020, allowed to verify that from  
524 the three rivers analyzed La Caldera River has the best water quality, with low and

525 sporadic fecal input, adequate for recreational activities, which was also described in  
526 previous work (Chávez Díaz et al, 2020; Gutiérrez Cacciabue et al, 2014). The Mojotero  
527 and the Arenales Rivers receive the impact of the discharges of the two wastewater  
528 treatment plants of the city, WWTP-N and WWTP-S, respectively. The WWTP-N is new  
529 and has capacity for treating efficiently the flow rate from the northern part of the city, thus,  
530 the discharges do not affect the water quality of the river at least between MR-1 and MR-2.  
531 Instead, the WWTP-S is an outdated treatment plant without enough capacity for a fast-  
532 growing city. The discharges of the WWTP-S significantly impacted the Arenales River,  
533 verified at AR-2, although the water quality was already poor at AR-1, 700 m upstream,  
534 due to domestic and industrial activities and to sporadic illegal discharges of raw sewage  
535 (Poma et al., 2012). The latest was evidenced by the high concentrations of fecal bacteria  
536 indicators.

537 Environmental surveillance as a tool to know about the circulation of viruses and other  
538 microorganisms causing disease in the population has been proposed for decades  
539 already. In fact, rivers that were impacted by wastewater has been monitored in multiple  
540 studies, like the analyses of circulation of human polio virus as part of the effort for the  
541 eradication (Delogu et al., 2018; Iaconelli et al, 2017; WHO, 2003) and of Hepatitis A virus  
542 after vaccination campaigns (Blanco Fernandez et al, 2012a), or of evolutionary  
543 relationships between norovirus (Blanco Fernandez, 2012b).

544 In the case of environmental surveillance of SARS-CoV-2 almost all the efforts around the  
545 world were focused on monitoring wastewater (Medema et al., 2020; Randazzo et al.,  
546 2020b; Wu et al., 2020), most of the times analyzing the inlets (and sometimes also the  
547 outlets) of wastewater treatment plants (Gonzalez et al., 2020; Nasser et al., 2021), but  
548 also at maintenance holes that are representative of defined areas of a city, or regions or  
549 neighborhoods (Larson et al., 2020). In some cases, the efficiency of wastewater



550 treatment plants to remove SARS-CoV-2 was evaluated, as in the studies conducted by  
551 Wurtzer et al. (2020) in France and by Rimoldi et al. (2020) in Italy.

552 Wastewater samples are useful to learn about the true viral circulation in a population of  
553 geographical interest, especially to estimate the extension of virus dissemination due to  
554 asymptomatic people, that seems to play an important role in the COVID-19 pandemic (He  
555 et al., 2020). In addition, these samples present the advantages that they are anonymous  
556 and non-invasive, they do not depend on the population will (to be tested) under analysis  
557 and they can be used by the respective health authorities to make smart decisions  
558 regarding the pandemic's management (Thompson et al., 2020).

559 While monitoring wastewater is a useful tool to evaluate the situation in developed  
560 countries this may not be the case in threshold or developing countries, where the sewage  
561 systems are insufficient or non-existent, or when the wastewater treatment is inefficient. In  
562 most of those places, rivers or other water bodies receive the discharges of untreated  
563 (sometimes illegally) or insufficiently treated wastewater, impacting the water quality and  
564 thus, the use of the resource (Rimoldi et al., 2020). In such scenarios, surface water like  
565 natural or artificial ponds (Iglesias et al., 2020) or rivers could also be used as tools for  
566 assessing the epidemiological situation of the population. The first attempt in that direction  
567 was done by Guerrero-Latorre and coworkers (2020) that evaluated the presence of  
568 SARS-CoV-2 in a context of low sanitation countries. They sampled once in natural  
569 streams located in three different regions of Quito, Ecuador. Although they quantified  
570 SARS-CoV-2 and human adenoviruses, as well as the number of reported cases, the  
571 study is limited due to the small number of samples analyzed. Issues like the presence,  
572 persistence, and potential infectivity of SARS-CoV-2 detected in the water environment  
573 have been under the discussion for the past year (Carducci et al., 2020; La Rosa et al.,  
574 2020).

575 According to the results of this and previous works, the Arenales River can properly play  
576 that role as it does reflect the pathogens circulating in the population. In fact, previous  
577 studies performed in the Arenales River revealed the circulation of multiples pathogens  
578 including bacteria, parasites, and various enteric viruses (Poma et al, 2012; Blanco  
579 Fernandez et al., 2012a; Blanco Fernandez et al., 2012b; Pisano et al., 2018; Prez et al.,  
580 2020). Furthermore, the microbiological risk for the population of being in contact with  
581 those water through recreational activities was estimated for enterovirus and norovirus  
582 (Poma et al, 2019).

583 The representation of the viral concentration in river water allows to see the variation along  
584 time. It is like a succession of instant photos (or moments) showing the situation in that  
585 specific point under analysis. Although it allows to understand the magnitude of the viral  
586 circulation in the area, there are some limitations that should be considered, especially if  
587 the intention is to estimate the number of infected people. A water body like a river will  
588 show flow rate variations due to the input of stormwater, illegal raw sewage, and industrial  
589 effluents, among others. In other words, the viral concentration will depend on all those  
590 human or natural contributions; thus, those flow rates or dilution factors should be  
591 considered if the absolute number of virus were to be calculated. On the other hand, there  
592 could be some discussion about the influence of population dynamic in the area of impact.  
593 One possibility to account for population dynamics and for other human and non-human  
594 inputs is to normalize the viral concentration using some other target or surrogate  
595 (Medema et al, 2020b). Some chemical compounds, like fecal sterols like coprostanol  
596 (Daughton, 2012; Chen et al, 2014), other viruses common in human urinary tract, like  
597 human polyomavirus (HPyV) (McQuaig et al., 2009) or pepper mild mottle virus (PMMoV)  
598 (D`Aoust et al, 2020), or bacterial fecal indicators like human Bacteroidales (D`Aoust et al,  
599 2020), just to mention some, have been suggested for normalization. The advantage of

600 using any of them is that, as they are excreted by all the population all the time, then  
601 cultural or seasonal effects could be neglected.

602 In addition to the detection of SARS-CoV-2, two other targets linked to human  
603 contamination were quantified in this work. One of them was the gene that encodes for  
604 human RNase P, which was used in many studies as an endogenous internal control  
605 (Arnold et al., 2020; Boddicker et al., 2007; Dahdouh, et al., 2020), and it has been  
606 extensively used as a sample quality control in clinical tests in the current COVID-19  
607 pandemic. The second one was the marker for human polyomaviruses, which has been  
608 proposed as a viral indicator of human fecal contamination and it is known to be stable in  
609 the environment. In addition, these viruses are excreted by feces and urine fluids  
610 (McQuaig et al., 2009; Bofill-Mas et al., 2000), with the species JC and BK reported as the  
611 most frequent and prevalent HPyV detected in sewage samples of this geographical  
612 region (Barrios et al., 2018).

613 Neither RNase P nor HPyV were detected in La Caldera River, showing again that fecal  
614 human contamination was just sporadic. In the case of Mojotoro River, RNase P was not  
615 detected and HPyV was present only in some of the samples, proving that those waters  
616 were only slightly impacted by wastewater. Conversely, in the case of the Arenales River,  
617 highly impacted by wastewater discharges, HPyV was quantified at both sampling points  
618 and the concentration was persistent and steady along the monitoring period. This was  
619 also the case for RNase P, which was only detected at AR-2.

620 Regarding normalization, although most of the times it has been done with only one target  
621 as reference, calculating the ratio between the gene of interest and the normalizer  
622 (McQuaig et al., 2009), it is highly recommended to use multiple genes for a more  
623 accurate normalization. For averaging of the control genes, it is recommended to use the  
624 geometric instead of the arithmetic mean, as the former controls are better for possible

625 outlying values and abundance differences between the different genes (Vandesompele et  
626 al., 2002).

627 In this case the concentration of SARS-CoV-2 from AR-2 was normalized in three different  
628 ways. The first one was as the ratio with the concentration of human polyomavirus, in  
629 which case the shape of the curve was not modified, the scale of results became too  
630 small, and the sense of the viral concentration magnitude was lost, plus the units were gc  
631 of SARS-CoV-2 per gc of HPyV. A similar situation resulted when the ratio of SARS-CoV-2  
632 was calculated with RNase P (gc of SARS-CoV-2/gc of RNase P), although the curved  
633 was slightly modified due to the fluctuations of RNase P concentration. Instead, the third  
634 way of normalizing, using both HPyV and RNase P according to equation 3, seemed more  
635 appropriate as the shape of the original concentration curved was not changed but mostly  
636 because the normalized values kept the sense of the magnitude.

637 In the case of the Arenales River the flow rate fluctuations were not measured; however,  
638 the difference in flow rate between the sampling points AR-1 and AR-2 (separated 700 m,  
639 no additional inputs verified) are only due to the discharges of the WWTP-S. What is  
640 interesting is that this discharge, far from producing a “dilution effect”, decreasing the viral  
641 concentration, has an “addition effect” increasing it due to the huge fecal contribution. This  
642 effect observed in the concentration of SARS-CoV-2 was also reflected in the  
643 concentration of the bacterial indicators measured. The magnitude of the discharge  
644 modified substantially, in a short distance, the microbiological and physico-chemical  
645 characteristics of the water river, differentiating this sampling point from all the others that  
646 were analyzed and minimizing any other effect related to the population dynamic or to  
647 seasonal effects. Finally, strong correlations were found between both the experimental  
648 and the normalized SARS-CoV-2 concentrations and the curve of active COVID-19 cases  
649 in the city of Salta. In this way, the water from the Arenales River, at AR-2, reflected the

650 population situation regarding viral circulation of COVID-19 cases, therefore, it could be  
651 well used as a surveillance tool.

652 This is, to the best of our knowledge, the first study that showed the dynamic of SARS-  
653 CoV-2 concentration in an urban river highly impacted by wastewater and proved that it  
654 can be used for SARS-CoV-2 surveillance to support health authorities' decisions.

655

## 656 **5. Conclusions**

- 657 • From the three rivers analyzed La Caldera River had the best water quality, and  
658 indicator bacteria were within acceptable limits for recreational activities.
- 659 • Although Mojotoro River receives the discharges of an old wastewater stabilization  
660 pond before MR-1 and the discharges of the northern wastewater treatment plant of  
661 the city before MR-2, they did not have a negative effect on the water quality.
- 662 • The Arenales River presented the poorest water quality. In addition to the  
663 contamination existing at AR-1 the discharges of the southern wastewater treatment  
664 plant contributed to the significant increase of fecal contamination at AR-2.
- 665 • SARS-CoV-2 was found in about half of the samples analyzed in low concentrations in  
666 La Caldera and Mojotoro Rivers. Instead, the virus concentration in the Arenales River  
667 was persistently high.
- 668 • Two human tracers, human polyomavirus (HPyV) and RNase P, were analyzed. None  
669 of them was detected in La Caldera River, only HPyV was found in Mojotoro River and  
670 at AR-1 in Arenales River, and both were quantified at AR-2 (Arenales River).
- 671 • The Arenales River, at AR-2, was highly impacted by wastewater and the  
672 concentration of SARS-CoV-2 was normalized using both human tracers. The  
673 experimental and the normalized concentrations correlated with the curve of

674 accumulated reported COVID-19 cases in the city. Thus, the Arenales River at AR-2  
675 reflects the epidemiological situation of the city.

676

## 677 **Acknowledgements**

678 This research was funded by Project COVID-19 233-785, from Fondo para la Investigación  
679 Científica y Tecnológica (FONCyT), Agencia Nacional de Promoción de la Investigación,  
680 el Desarrollo Tecnológico y la Innovación, Argentina. María Noel Maidana Kulesza, Diego  
681 Gastón Sanguino-Jorquera, Sarita Reyes, María del Milagro Said-Adamo, and Martín  
682 Mainardi Remis are recipients of doctoral fellowships from CONICET.

683

## 684 **References**

685 Albastaki, A., Najj, M., Lootah, R., Almeheiri, R., Almulla, H., Almarri, I., Alreyami, A.,  
686 Aden, A., Alghafri, R. (2021) First confirmed detection of SARS-COV-2 in untreated  
687 municipal and aircraft wastewater in Dubai, UAE: The use of wastewater-based  
688 epidemiology as an early warning tool to monitor the prevalence of COVID-19. *Science*  
689 *of The Total Environment* 760, 143350.

690 Amirian, E. S. (2020) Potential fecal transmission of SARS-CoV-2: current evidence and  
691 implications for public health. *International Journal of Infectious Diseases* 95, 363-370.

692 Arnold, M. T., Temte, J. L., Barlow, S. K., Bell, C. J., Goss, M. D., Temte, E. G.,  
693 Checovich, M. M., Reisdorf, E., Scott, S., Guenther, K., Wedig, M., Shult, P., Uzicanin,  
694 A. (2020) Comparison of participant-collected nasal and staff-collected oropharyngeal  
695 specimens for human ribonuclease P detection with RT-PCR during a community-  
696 based study. *PloS One* 15(10), e0239000.

- 697 Boddicker, J. D., Rota, P. A., Kreman, T., Wangeman, A., Lowe, L., Hummel, K. B.,  
698 Thompson, R., Bellini, W. J., Pentella, M., DesJardin, L. E. (2007) Real-time reverse  
699 transcription-PCR assay for detection of mumps virus RNA in clinical specimens.  
700 *Journal of Clinical Microbiology* 45(9), 2902-2908.
- 701 Barrios, M. E., Fernández, M. D. B., Cammarata, R. V., Torres, C., Mbayed, V. A. (2018)  
702 Viral tools for detection of fecal contamination and microbial source tracking in  
703 wastewater from food industries and domestic sewage. *Journal of Virological Methods*  
704 262, 79-88.
- 705 Betancourt, W. Q., Schmitz, B. W., Innes, G. K., Prasek, S. M., Brown, K. M. P., Stark, E.  
706 R., Foster, A. R., Sprissler, R. S., Harris, D. T., Sherchan, S. P., Gerba, C. P., Pepper,  
707 I. L. (2021) COVID-19 containment on a college campus via wastewater-based  
708 epidemiology, targeted clinical testing and an intervention. *Science of the Total*  
709 *Environment* 779, 146408.
- 710 Blanco Fernández, M. D., Torres, C., Riviello-López, G., Poma, H. R., Rajal, V. B., Nates,  
711 S., Cisterna, D. M., Campos, R. H., Mbayed, V. A. (2012a) Analysis of the circulation of  
712 hepatitis A virus in Argentina since vaccine introduction. *Clinical Microbiology and*  
713 *Infection* 18(12), E548-E551.
- 714 Blanco Fernández, M. D., Torres, C., Poma, H. R., Riviello-López, G., Martínez, L. C.,  
715 Cisterna, D. M., Rajal, V. B., Nates, S., Mbayed, V. A. (2012b) Environmental  
716 surveillance of norovirus in Argentina revealed distinct viral diversity patterns,  
717 seasonality and spatio-temporal diffusion processes. *Science of the Total Environment*  
718 437, 262-269.

- 719 Bofill-Mas, S., Pina, S., Girones, R. (2000) Documenting the epidemiologic patterns of  
720 polyomaviruses in human populations by studying their presence in urban sewage.  
721 Applied and Environmental Microbiology 66(1), 238-245.
- 722 Carducci, A., Federigi, I., Liu, D, Thompson, J. R., Veran M. (2020) Making Waves:  
723 Coronavirus detection, presence and persistence in the water environment: State of  
724 the art and knowledge needs for public health. Water Research 179 (2020) 115907
- 725 CDC (2020) 2019-Novel Coronavirus (2019-nCoV) Real-Time rRT-PCR Panel Primers  
726 and Probes. Centers for Disease Control and Prevention, U.S.  
727 <https://www.cdc.gov/coronavirus/2019-ncov/lab/rt-pcrpanel-primer-probes.html> (Last  
728 accessed 16th June, 2020).
- 729 Chávez-Díaz, L. V., Gutiérrez-Cacciabue, D., Poma, H. R., Rajal, V. B. (2020) Sediments  
730 quality must be considered when evaluating freshwater aquatic environments used for  
731 recreational activities. International Journal of Hygiene and Environmental Health 223,  
732 159-170.
- 733 Chen, C., Kostakis, C., Gerber, J. P., Tscharke, B. J., Irvine, R. J., White, J. M. (2014)  
734 Towards finding a population biomarker for wastewater epidemiology studies. Science  
735 of the Total Environment 487, 621-628.
- 736 Cruz, M. C., Gutiérrez Cacciabue, D., Gil, J. F., Gamboni, O., Vicente, M. S., Wuertz, S.,  
737 Gonzo, E. E., Rajal, V. B (2012) The impact of point source pollution on shallow  
738 groundwater used for human consumption in a threshold country. Journal of  
739 Environmental Monitoring 14, 2338-2349.
- 740 Di Rienzo, J. A., Casanoves, F., Balzarini, M. G., Gonzalez, L., Tablada, M., Robledo, C.  
741 W. (2016) InfoStat version 2016. Grupo InfoStat, FCA, Universidad Nacional de  
742 Córdoba, Argentina. URL <http://www.infostat.com.ar>.



- 743 Dahdouh, E., Lázaro-Perona, F., Romero-Gómez, M. P., Mingorance, J., García-  
744 Rodríguez, J. (2021) Ct values from SARS-CoV-2 diagnostic PCR assays should not  
745 be used as direct estimates of viral load. *Journal of Infection* 82(3), 414-451.
- 746 D'Aoust, P. M., Mercier, É., Montpetit, D., Jia, J. J., Alexandrov, I., Tariq Baig, A., Mayne,  
747 J., Zhang, X., Alain, T., Servos, M. R., MacKenzie, M., Figeys, D., MacKenzie, A. E.,  
748 Graber, T. E., Delatolla, R. (2020) Quantitative analysis of SARS-CoV-2 RNA from  
749 wastewater solids in communities with low COVID-19 incidence and prevalence. *Water*  
750 *Research* 188, 116560.
- 751 Daughton, C. G. (2012) Using biomarkers in sewage to monitor community-wide human  
752 health: isoprostanes as conceptual prototype. *Science of the Total Environment* 424,  
753 16-38.
- 754 Delogu, R., Battistone, A., Buttinelli, G., Fiore, S., Fontana, S., Amato, C., Cristiano, K.,  
755 Gamper, S., Simeoni, J., Frate, R., Pellegrinelli, L., Binda, S., Veronesi, L., Zoni, R.,  
756 Castiglia, P., Cossu, A., Triassi, M., Pennino, F., Germinario, C., Balena, V., Cicala, A.,  
757 Mercurio, P., Fiore, L., Pini, C., Stefanelli, P. (2018) Poliovirus and other enteroviruses  
758 from environmental surveillance in Italy, 2009–2015. *Food and environmental*  
759 *virology* 10(4), 333-342.
- 760 Eaton, A. D., Clesceri, L. S., Rice, E. W., Greenberg, A. E., Franson, M. A. H. (2005)  
761 *Standard Methods for the Examination of Water and Wastewater*. 21<sup>st</sup> Edition. APHA.  
762 American Public Health Association.
- 763 Gonzalez, R., Curtis, K., Bivins, A., Bibby, K., Weir, M. H., Yetka, K., Thompson, H.,  
764 Keeling, D., Mitchell, J., Gonzalez, D. (2020) COVID-19 surveillance in Southeastern  
765 Virginia using wastewater-based epidemiology. *Water Research* 186, 116296.

- 766 Gorbalenya, A. E., Baker, S. C., Baric, R., Groot, R. J. D., Drosten, C., Gulyaeva, A. A.,  
767 Haagmans, B. L., Lauber, C., Leontovich, A. M., Neuman, B. W., Penzar, D., Perlman,  
768 S., Poon, L., Samborskiy, D., Sidorov, I. A., Solá-Gurpegui, I., Ziebuhr, J. (2020)  
769 Severe acute respiratory syndrome-related coronavirus: The species and its viruses—a  
770 statement of the Coronavirus Study Group. *Nature Microbiology*, DOI:  
771 10.1038/s41564-020-0695-z.
- 772 Guan, W. J., Ni, Z. Y., Hu, Y., Liang, W. H., Ou, C. Q., He, J. X., Liu, L., Shan, H. Lei, C-L,  
773 Hui, D., Du, B., Li, L. J., Zeng, G., Yuen, K. Y., Chen, R. C., Tang, C. L., Wang, T.,  
774 Chen, P. Y., Xiang, J., Li, S. Y., Wang, J. L., Liang, Z., Peng, Y., Wei, L., Liu, Y., Hu,  
775 Y., Peng, P., Wang, J., Liu, J., Zhong, C., Li, G., Zheng, Z., Qiu, S., Luo, J., Ye, C.,  
776 Zhu, S., Zhong, N. (2020) Clinical characteristics of 2019 novel coronavirus infection  
777 in China. *New England Journal of Medicine* 382(18), 1708-1720.
- 778 Guerrero-Latorre, L., Ballesteros, I., Villacrés-Granda, I., Granda, M. G., Freire-Paspuel,  
779 B., Ríos-Touma, B. (2020) SARS-CoV-2 in river water: Implications in low sanitation  
780 countries. *Science of the Total environment* 743, 140832.
- 781 Gutiérrez Cacciabue, D., Teich, I., Poma, H. R., Cruz, M. C., Balzarini, M., Rajal, V. B.  
782 (2014) Strategies to optimize monitoring schemes of recreational waters using a  
783 multivariate approach. *Environmental Monitoring and Assessment* 186(12), 8359-8380.
- 784 Harrison, A. G., Lin, T., Wang, P. (2020) Mechanisms of SARS-CoV-2 transmission and  
785 pathogenesis. *Trends in Immunology* 41(12), 1100-1115.
- 786 He, D., Zhao, S., Lin, Q., Zhuang, Z., Cao, P., Wang, M. H., Yang, L. (2020) The relative  
787 transmissibility of asymptomatic COVID-19 infections among close contacts.  
788 *International Journal of Infectious Diseases* 94, 145-147.

- 789 Iaconelli, M., Muscillo, M., Della Libera, S., Fratini, M., Meucci, L., De Ceglia, M., Giacosa,  
790 D., La Rosa, G. (2017) One-year surveillance of human enteric viruses in raw and  
791 treated wastewaters, downstream river waters, and drinking waters. Food and  
792 Environmental Virology 9(1), 79-88.
- 793 Iglesias, N. G., Gebhard, L. G., Carballeda, J. M., Aiello, I., Recalde, E., Terny, G.,  
794 Ambrosolio, S., L'Arco, G., Konfino, J., Brardinelli, J. I. (2020) SARS-CoV-2  
795 surveillance in untreated wastewater: first detection in a low-resource community in  
796 Buenos Aires, Argentina. MedRxiv preprint;  
797 <https://doi.org/10.1101/2020.10.21.20215434>.
- 798 Ihaka, R., Gentleman, R. (1996) R: a language for data analysis and graphics. Journal of  
799 Computational and Graphical Statistics 5(3), 299-314.
- 800 Jarrous, N., Altman, S. (2001) Human ribonuclease P. Methods in Enzymology 342, 93-  
801 100.
- 802 Jeong, H. W., Kim, S. M., Kim, H. S., Kim, Y. I., Kim, J. H., Cho, J. Y., Kim, S. H., Kang,  
803 H., Kim, S. G., Park, S. J., Kim, E. H., Choi, Y. K. (2020) Viable SARS-CoV-2 in  
804 various specimens from COVID-19 patients. Clinical Microbiology and Infection 26(11),  
805 1520-1524.
- 806 Jiang, X., Luo, M., Zou, Z., Wang, X., Chen, C., Qiu, J. (2020) Asymptomatic SARS-CoV-2  
807 infected case with viral detection positive in stool but negative in nasopharyngeal  
808 samples lasts for 42 days. Journal of Medical Virology 92(10), 1807-1809.
- 809 Kampf, G., Todt, D., Pfaender, S., Steinmann, E. (2020) Persistence of coronaviruses on  
810 inanimate surfaces and their inactivation with biocidal agents. Journal of Hospital  
811 Infection 104(3), 246-251.

- 812 Kumar, M., Patel, A. K., Shah, A. V., Raval, J., Rajpara, N., Joshi, M., Joshi, C. G. (2020)  
813 First proof of the capability of wastewater surveillance for COVID-19 in India through  
814 detection of genetic material of SARS-CoV-2. *Science of The Total Environment* 746,  
815 141326.
- 816 La Rosa, G., Bonadonna, L., Lucentini, L., Kenmoe, S., Suffredini, E. (2020) Coronavirus  
817 in water environments: Occurrence, persistence and concentration methods - A  
818 scoping review. *Water Research* 179 (2020) 115899.
- 819 Larson, R. C., Berman, O., Nourinejad, M. (2020). Sampling manholes to home in on  
820 SARS-CoV-2 infections. *PLoS ONE* 15(10): e0240007.
- 821 Lomniczi, I., Boemo, A., Musso, H. (2007) Location and characterization of pollution sites  
822 by principal component analysis of trace contaminants in a slightly polluted seasonal  
823 river: A case study of the Arenales River (Salta, Argentina). *Water SA* 33(4).
- 824 McQuaig, S. M., Scott, T. M., Lukasik, J. O., Paul, J. H., Harwood, V. J. (2009)  
825 Quantification of human polyomaviruses JC virus and BK virus by TaqMan quantitative  
826 PCR and comparison to other water quality indicators in water and fecal samples.  
827 *Applied and Environmental Microbiology* 75(11), 3379-3388.
- 828 Medema, G., Heijnen, L., Elsinga, G., Italiaander, R., Brouwer, A. (2020a) Presence of  
829 SARS-Coronavirus-2 RNA in sewage and correlation with reported COVID-19  
830 prevalence in the early stage of the epidemic in the Netherlands. *Environmental*  
831 *Science & Technology Letters* 7(7), 511-516.
- 832 Medema, G., Been, F., Heijnen, L., Petersen, S. (2020b) Implementation of environmental  
833 surveillance for SARS-CoV-2 virus to support public health decisions: Opportunities  
834 and challenges. *Current Opinion in Environmental Science & Health* 17, 49-71.

- 835 Mukhra, R., Krishan, K., Kanchan, T. (2020) Possible modes of transmission of Novel  
836 coronavirus SARS-CoV-2: a review. *Acta Bio-Medica* 91(3), e2020036.  
837 <https://doi.org/10.23750/abm.v91i3.10039>
- 838 Nasserri, S., Yavarian, J., Norouzian Baghani, A., Mokhtari Azad, T., Nejati, A., Nabizadeh,  
839 R., Hadi, M., Shafiei Jandaghi, N. Z., Vakili, B., Azam Vaghefi, S. K., Baghban, M.,  
840 Yousefi, S., Nazmara, S., Alimohammadi, M. (2021) The presence of SARS-CoV-2 in  
841 raw and treated wastewater in 3 cities of Iran: Tehran, Qom and Anzali during  
842 coronavirus disease 2019 (COVID-19) outbreak. *Journal of Environmental Health*  
843 *Science and Engineering*. <https://doi.org/10.1007/s40201-021-00629-6>.
- 844 Park, S. K., Lee, C. W., Park, D. I., Woo, H. Y., Cheong, H. S., Shin, H. C., Ahn, K., Kwon,  
845 M. J., Joo, E. J. (2020) Detection of SARS-CoV-2 in Fecal Samples from Patients with  
846 Asymptomatic and Mild COVID-19 in Korea. *Clinical Gastroenterology and Hepatology*.  
847 <https://doi.org/10.1016/j.cgh.2020.06.005>.
- 848 Peiris, J. S. M. Lai, S. T., Poon, L. L. M., Guan, Y., Yam, L. Y. C., Lim, W., Nicholls, J.,  
849 Yee, W. K. S., Yan, W. W., Cheung, M. T., Cheng, V. C. C., Chan, K. H. Tsang, D. N.  
850 C., Yung, R. W. H., Ng, T. K., Yuen, K. Y. (2003) Coronavirus as a possible cause of  
851 severe acute respiratory syndrome. *The Lancet* 361(9366), 1319-1325.
- 852 Pisano, M. B., Lugo, B., Poma, H. R., Cristóbal, H. A., Raskovsky, V., Martínez Wassaf, M.  
853 G., Rajal, V. B., Ré, V. E. (2018) Environmental hepatitis E virus detection supported  
854 by serological evidence in the northwest of Argentina. *Transactions of the Royal*  
855 *Society of Tropical Medicine and Hygiene* 112(4), 181-187.
- 856 Poma, H. R., Cacciabue, D. G., Garcé, B., Gonzo, E. E., Rajal, V. B. (2012) Towards a  
857 rational strategy for monitoring of microbiological quality of ambient waters. *Science of*  
858 *the Total Environment* 433, 98-109.

- 859 Poma, H. R., Kundu, A., Wuertz, S., Rajal, V. R. (2019) Data fitting approach more critical  
860 than exposure scenarios and treatment of censored data for quantitative microbial risk  
861 assessment. *Water Research* 154, 45-53.
- 862 Prez, V. E., Poma, H. R., Giordano, G. G., Victoria, M., Nates, S. V., Rajal, V. B., Barril, P.  
863 A. (2020) Rotavirus contamination of surface waters from the northwest of Argentina.  
864 *Journal of Water and Health* 18(3), 409-415.
- 865 Randazzo, W., Cuevas-Ferrando, E., Sanjuán, R., Domingo-Calap, P., Sánchez, G.  
866 (2020b) Metropolitan wastewater analysis for COVID-19 epidemiological surveillance.  
867 *International Journal of Hygiene and Environmental Health* 230, 113621.
- 868 Randazzo, W., Truchado, P., Cuevas-Ferrando, E., Simón, P., Allende, A., Sánchez, G.  
869 (2020a) SARS-CoV-2 RNA in wastewater anticipated COVID-19 occurrence in a low  
870 prevalence area. *Water Research* 181, 115942.
- 871 R Development Core Team (2005) R: A Language and Environment for Statistical  
872 Computing. Vienna, Austria: R Foundation for Statistical Computing ([http://www.R-](http://www.R-project.org)  
873 [project.org](http://www.R-project.org)).
- 874 Rimoldi, S. G., Stefani, F., Gigantiello, A., Polesello, S., Comandatore, F., Mileto, D.,  
875 Maresca, M., Longobardi, C., Mancon, A., Romeri, F., Pagani, C., Cappelli, F.,  
876 Roscioli, C., Moja, L., Gismondo, M. R., Salerno, F. (2020) Presence and infectivity of  
877 SARS-CoV-2 virus in wastewaters and rivers. *Science of the Total Environment*, 744,  
878 140911.
- 879 RStudio Team (2020). RStudio: Integrated Development for R. RStudio, PBC, Boston, MA  
880 URL <http://www.rstudio.com/>.

- 881 Saththasivam, J., El-Malah, S. S., Gomez, T. A., Jabbar, K. A., Remanan, R.,  
882 Krishnankutty, A. K., Ogunbiyi, O., Rasool, K., Ashhab, S., Rashkeeb, S., Bensaad, M.,  
883 Ahmed, A. A., Mohamoud, Y. A., Malek, J. A., Abu-Raddad, L. J., Jeremijenko, A.,  
884 Abu-Halaweh, H. A., Lawler, J., Mahmoud, K. A. (2021) COVID-19 (SARS-CoV-2)  
885 outbreak monitoring using wastewater-based epidemiology in Qatar. *Science of the*  
886 *Total Environment* 774, 145608.
- 887 Shapiro, S.S., Francia, R. S. (1972) An Approximate Analysis of Variance Test for  
888 Normality. *Journal of the American Statistical Association* 67(337), 215-216.
- 889 Sun, J., Zhu, A., Li, H., Zheng, K., Zhuang, Z., Chen, Z., Shi, Y., Zhang, Z., Chen, S. B.,  
890 Liu, X., Dai, J., Li, X., Huang, S., Luo, L., Wen, L., Zhuo, J., Li, Y., Wang, Y., Zhang, L.,  
891 Zhang, Y., Li, F., Feng, L., Chen, X., Zhong, N., Yang, Z., Huang, J., Zhao, J., Li, Y. M.  
892 (2020) Isolation of infectious SARS-CoV-2 from urine of a COVID-19 patient. *Emerging*  
893 *Microbes & Infections* 9(1), 991-993.
- 894 USEPA, United States Environmental Protection Agency, 2002. Method 1106.1:  
895 Enterococci in Water by Membrane Filtration Using Membrane-Enterococcus-Esculin  
896 Iron Agar (mE-EIA). EPA 600-4-85-076.
- 897 USEPA, United States Environmental Protection Agency, 2014. Method 1603: *Escherichia*  
898 *coli* (*E. coli*) in Water by Membrane Filtration Using Modified membrane-  
899 Thermotolerant *Escherichia coli* Agar (Modified mTEC). EPA-82 1-R-14-010.
- 900 USEPA, United States Environmental Protection Agency. 2012. Recreational Water  
901 Quality Criteria. Office of Water, United States Environmental Protection Agency  
902 (USEPA), Washington, DC. Online: [https://www.epa.gov/sites/production/.../rec-](https://www.epa.gov/sites/production/.../rec-factsheet-2012.pdf)  
903 [factsheet-2012.pdf](https://www.epa.gov/sites/production/.../rec-factsheet-2012.pdf).

- 904 Vandesompele, J., De Preter, K., Pattyn, F., Poppe, B., Van Roy, N., De Paepe, A.,  
905 Speleman, F. (2002) Accurate normalization of real-time quantitative RT-PCR data by  
906 geometric averaging of multiple internal control genes. *Genome Biology* 3(7), 1-12.
- 907 WHO (2003) Guidelines for environmental surveillance of poliovirus circulation (No.  
908 WHO/V&B/03.03). World Health Organization.
- 909 WHO (2020) World Health Organization. <https://covid19.who.int/> (Last accessed 16<sup>th</sup> June,  
910 2021).
- 911 Wickham, H. (2009) *ggplot2: Elegant Graphics for Data Analysis* Springer-Verlag New  
912 York.
- 913 Wölfel, R., Corman, V. M., Guggemos, W., Seilmaier, M., Zange, S., Müller, M. A.,  
914 Niemeyer, D., Jones, T. C., Vollmar, P., Rothe, C., Hoelscher, M., Bleicker, T., Brünink,  
915 S., Schneider, J., Ehmman, R., Zwirgmaier, K., Drosten, C., Wendtner, C. (2020)  
916 Virological assessment of hospitalized patients with COVID-2019. *Nature* 581, 465-  
917 469.
- 918 Wu, F., Xiao, A., Zhang, J., Moniz, K., Endo, N., Armas, F., Bushman, M., Chai, P. R.,  
919 Duvalle, C., Erickson, T. B., Foppe, K., Ghaeli, N., Gu, X., Hanage, W. P., Huang, K.  
920 H., Lee, W. L., Matus, M., McElroy, K. A., Rhode, S. F., Wuertz, S., Thompson, J., Alm,  
921 E. J. (2020) Wastewater Surveillance of SARS-CoV-2 across 40 U.S. states. *MedRxiv*  
922 preprint doi: <https://doi.org/10.1101/2021.03.10.21253235>
- 923 Wurtzer, S., Marechal, V., Mouchel, J. M., Moulin, L. (2020) Time Course Quantitative  
924 Detection of SARS-CoV-2 in Parisian Wastewaters Correlates with COVID-19  
925 Confirmed Cases. *medRxiv*. DOI:10.1101/2020.04.12.20062679.



- 926 Xiao, F., Sun, J., Xu, Y., Li, F., Huang, X., Li, H., Zhao, Jingxian., Huang, J. Zhao, J.  
927 (2020a) Infectious SARS-CoV-2 in feces of patient with severe COVID-19. *Emerging*  
928 *Infectious Diseases* 26(8), 1920-1922.
- 929 Xiao, F., Tang, M., Zheng, X., Liu, Y., Li, X., Shan, H. (2020b) Evidence for gastrointestinal  
930 infection of SARS-CoV-2. *Gastroenterology* 158(6), 1831-1833.
- 931 Zaki, A. M., van Boheemen, S., Bestebroer, T. M., Osterhaus, A. D. M. E., Fouchier, R. A.  
932 M. (2012) Isolation of a Novel Coronavirus from a Man with Pneumonia in Saudi  
933 Arabia. *New England Journal of Medicine* 367, 1814-1820.
- 934 Zhang, H., Kang, Z., Gong, H., Xu, D., Wang, J., Li, Zhixiu, Li, Zifu, Cui, X., Xiao, J., Zhan,  
935 J., Meng, T., Zhou, W., Liu, J. Xu, H. (2020b) Digestive system is a potential route of  
936 COVID-19: an analysis of single-cell coexpression pattern of key proteins in viral entry  
937 process. *Gut*, 69(6), 1010-1018.
- 938 Zhang, J., Wang, S., Xue, Y. (2020c) Fecal specimen diagnosis 2019 novel coronavirus–  
939 infected pneumonia. *Journal of Medical Virology* 92(6), 680-682.
- 940 Zhang, R., Li, Y., Zhang, A. L., Wang, Y., Molina, M. J. (2020a) Identifying airborne  
941 transmission as the dominant route for the spread of COVID-19. *Proceedings of the*  
942 *National Academy of Sciences* 117(26), 14857-14863.
- 943 Zhang, Y., Chen, C., Zhu, S., Shu, C., Wang, D., Song, J., Song, Y., Zhen, W., Feng, Z.,  
944 Wu, G., Xu, J., Xu, W. (2020d) Isolation of 2019-nCoV from a stool specimen of a  
945 laboratory-confirmed case of the coronavirus disease 2019 (COVID-19). *China CDC*  
946 *Weekly*, 2(8), 123-124.
